# Supplementary material for: Retrospective cohort study of the relationship between systolic blood pressure variability and multiple sclerosis disability
Source: PubMed Central journal article supplement — BMJ Open. 2020 Feb 17;10(2):e034355. doi: 10.1136/bmjopen-2019-034355 (PMC7045000; doi:10.1136/bmjopen-2019-034355), 2020-02-17
Supplement: bmjopen-2019-034355.draft_revisions.pdf [file bmjopen-2019-034355.draft_revisions.pdf]

# BMJ Open

BMJ Open is committed to open peer review. As part of this commitment we make the peer review history of every article we publish publicly available.

When an article is published we post the peer reviewers' comments and the authors' responses online. We also post the versions of the paper that were used during peer review. These are the versions that the peer review comments apply to.

The versions of the paper that follow are the versions that were submitted during the peer review process. They are not the versions of record or the final published versions. They should not be cited or distributed as the published version of this manuscript.

BMJ Open is an open access journal and the full, final, typeset and author-corrected version of record of the manuscript is available on our site with no access controls, subscription charges or pay-per-view fees (<http://bmjopen.bmj.com>).

If you have any questions on BMJ Open's open peer review process please email [info.bmjopen@bmj.com](mailto:info.bmjopen@bmj.com)

# BMJ Open

## **Systolic Blood Pressure Variability is Associated with Increased Multiple Sclerosis Disability**

|                               |                                                                                                                                                                                                                                  |
|-------------------------------|----------------------------------------------------------------------------------------------------------------------------------------------------------------------------------------------------------------------------------|
| Journal:                      | <i>BMJ Open</i>                                                                                                                                                                                                                  |
| Manuscript ID                 | bmjopen-2019-034355                                                                                                                                                                                                              |
| Article Type:                 | Original research                                                                                                                                                                                                                |
| Date Submitted by the Author: | 16-Sep-2019                                                                                                                                                                                                                      |
| Complete List of Authors:     | Goldman, M; University of Virginia, Neurology<br>Min, Seulgi; University of Virginia<br>Mason Lobo, Jennifer ; University of Virginia, Public Health Sciences<br>Sohn, Min-Woong; University of Virginia, Public Health Sciences |
| Keywords:                     | Multiple sclerosis < NEUROLOGY, disability progression, blood pressure variability, cardiovascular comorbidities                                                                                                                 |
|                               |                                                                                                                                                                                                                                  |

SCHOLARONE™  
Manuscripts

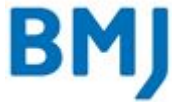

I, the Submitting Author has the right to grant and does grant on behalf of all authors of the Work (as defined in the below author licence), an exclusive licence and/or a non-exclusive licence for contributions from authors who are: i) UK Crown employees; ii) where BMJ has agreed a CC-BY licence shall apply, and/or iii) in accordance with the terms applicable for US Federal Government officers or employees acting as part of their official duties; on a worldwide, perpetual, irrevocable, royalty-free basis to BMJ Publishing Group Ltd ("BMJ") its licensees and where the relevant Journal is co-owned by BMJ to the co-owners of the Journal, to publish the Work in this journal and any other BMJ products and to exploit all rights, as set out in our [licence](#).

The Submitting Author accepts and understands that any supply made under these terms is made by BMJ to the Submitting Author unless you are acting as an employee on behalf of your employer or a postgraduate student of an affiliated institution which is paying any applicable article publishing charge ("APC") for Open Access articles. Where the Submitting Author wishes to make the Work available on an Open Access basis (and intends to pay the relevant APC), the terms of reuse of such Open Access shall be governed by a Creative Commons licence – details of these licences and which [Creative Commons](#) licence will apply to this Work are set out in our licence referred to above.

Other than as permitted in any relevant BMJ Author's Self Archiving Policies, I confirm this Work has not been accepted for publication elsewhere, is not being considered for publication elsewhere and does not duplicate material already published. I confirm all authors consent to publication of this Work and authorise the granting of this licence.

1  
2  
3  
4  
5  
6  
7  
8  
9 **SYSTOLIC BLOOD PRESSURE VARIABILITY IS ASSOCIATED WITH INCREASED**  
10 **MULTIPLE SCLEROSIS DISABILITY**  
11

12 Running title: Blood-pressure Variability and MS Disability  
13  
14  
15  
16  
17  
18  
19  
20

21 Myla D. Goldman, MD, MSc;<sup>1</sup> Seulgi Min, BA;<sup>2</sup> Jennifer M. Lobo, Ph.D.;<sup>3</sup> Min-Woong Sohn,  
22 Ph.D.<sup>3</sup>  
23  
24  
25

26 <sup>1</sup> Department of Neurology, University of Virginia, Charlottesville, Virginia

27 <sup>2</sup> College of Arts and Sciences, University of Virginia, Charlottesville, Virginia

28 <sup>3</sup> Department of Public Health Sciences, University of Virginia, Charlottesville, Virginia  
29  
30  
31

32 Corresponding Author:

33 Myla D. Goldman, MD, MSc

34 University of Virginia Department of Neurology

35 PO Box 800394

36 Charlottesville, VA 22908

37 P: 434-982-3936

38 F: 434-243-5420

39 Email: mdg3n@virginia.edu  
40  
41  
42

43 Word count of Abstract: 227

44 Word count of Paper: 2627  
45  
46  
47  
48  
49  
50  
51  
52  
53  
54  
55  
56  
57  
58  
59  
60

## ABSTRACT

**Objective:** To examine the relationship between visit-to-visit systolic blood pressure (SBP) variability and patient-reported outcome measure of disability in multiple sclerosis (MS) patients.

**Design:** A retrospective cohort study of individuals with MS who completed a Patient Determined Disease Steps (PDDS) scale between 2011 – 2015 at a multiple sclerosis specialty clinic.

**Participants:** Individuals with MS for whom both a completed PDDS scale and  $\geq 3$  SBP measures within the prior 12 months of the survey were available.

**Main Outcome Measure:** Participants were grouped into three classes of disability (No or Mild (PDDS 0 - 1), Moderate (2 - 3), Severe (4 - 7)). SBP variability was calculated as within-subject standard deviations using all SBP measures taken during the past 12 months. SBP variability was analyzed by Tertile groups.

**Results:** Ninety-two subjects were included in this analysis. Compared to those in Tertile 1 (lowest variability), subjects in Tertile 2 were 3.8 times more likely (OR = 3.77; 95% CI, 1.20 – 11.87) and those in Tertile 3 (highest variability) were 5.5 times more likely (OR = 5.48; 95% CI, 1.65 – 18.15;  $p = 0.005$ ) to be in a higher disability group ( $p$  for trend = 0.006), independent of mean SBP.

**Conclusions:** Our results show a significant gradient relationship between SBP variability and MS-related disability. More research is needed to determine the underlying pathophysiological relationship between SBP variability and MS disability progression.

**Keywords:** multiple sclerosis, disability progression, blood pressure variability, cardiovascular comorbidities

## Article Summary

### Strengths and Limitations of This Study

- This is a first study to look at the relationship between the Systolic Blood Pressure (SBP) variability and MS-related disability outcomes.
- This study paired prospectively collected patient-reported outcomes with retrospectively collected data, which allowed us to leverage existing data to take a first look at this novel question.
- Our analysis included a multi-faceted approach including - patient-reported measures, clinical outcomes (blood pressure), and concurrent co-morbid diagnosis.
- The retrospective collection of the paired clinical data limited the standardization of the number and inter-interval timing of blood pressure measurements, as well as the total number of subjects available for analysis.

### 1. Introduction

Multiple Sclerosis (MS) is an inflammatory and degenerative disorder of the central nervous system. Individuals with MS commonly experience some degree of disability progression independent of inflammatory driven events. The underlying mechanisms driving this inflammatory-independent disease progression remains poorly understood. It is likely that there is no single factor that drives MS progression. Instead it is believed to be a multi-faceted process with variable importance and influence of factors for any individual person. Posited factors include medical co-morbidities, as well as environmental factors such as smoking or vitamin D exposure.

1  
2  
3 In MS patients, co-morbid cardiovascular disease is associated with worsened disease  
4 progression and reduced quality of life, although the mechanism remains uncertain.<sup>1-5</sup> Visit-to-  
5 visit systolic blood pressure (SBP) variability is an emerging risk factor for a wide array of  
6 health outcomes including cardiovascular disease (CVD), kidney failure, cognitive dysfunction,  
7 diabetic complications, and all-cause mortality.<sup>6-10</sup> Excessive SBP variability ( $\geq 10$  within-  
8 subject standard deviation) has been associated with many of these outcomes independent of  
9 mean blood pressure and hypertension.<sup>8,11,12</sup> Evidence suggests that visit-to-visit blood pressure  
10 variability may have stronger effects on cardiovascular outcomes than that of measures taken  
11 during a single visit or by 24-hour ambulatory monitoring devices.<sup>13-15</sup> While various vascular  
12 comorbidities have been previously studied in the progression of MS, the relationship between  
13 SBP variability and MS progression has yet to be explored.

14  
15  
16  
17  
18  
19  
20  
21  
22  
23  
24  
25  
26  
27  
28  
29 We conducted a retrospective cohort study to examine the relationship between SBP  
30 variability and self-reported MS disability. We hypothesized that higher SBP variability is  
31 associated with greater degree of disability among individuals with MS.

## 32 33 34 35 36 37 **2. Material and Methods**

### 38 39 40 **Study Design and Sample**

41  
42  
43 We conducted a retrospective cohort study of individuals with MS who participated in  
44 research between 2011 and 2015 at the University of Virginia School of Medicine (UVA) and  
45 had previously prospectively completed the Patient Determined Disease Steps (PDDS) scale, a  
46 validated patient-reported outcome measure of MS disability.<sup>16-18</sup> The PDDS is a self-report tool  
47 of MS disability in which participants indicate their level of disability between 0 ('normal') and  
48 8 ('bedridden'), where 4 indicates "early cane" use. SBP measurements were obtained from  
49  
50  
51  
52  
53  
54  
55  
56  
57  
58  
59  
60

1  
2  
3 medical records and only those subjects with  $\geq 3$  available SBP measurements captured within  
4  
5 the 12 months prior to PDDS completion were included in the analysis. This study was approved  
6  
7 by the UVA institutional review board.  
8  
9

### 10 **Visit-to-visit variability of systolic blood pressure**

11  
12 All available SBP measures within 12-months pre- and post- PDDS survey data were extracted  
13  
14 from the electronic medical records system. Within-subject means and standard deviations of  
15  
16 SBP were computed. Coefficient of variation was calculated by dividing the standard deviation  
17  
18 by the mean to categorize the sample into tertile groups.  
19  
20  
21  
22

### 23 **Covariates**

24  
25 Demographic data (age, sex, and race/ethnicity) were collected. We searched with  
26  
27 Clinical Data Repository (CDR), a data warehouse containing clinical information from patients  
28  
29 treated at the University of Virginia, for the 12-month period prior to the PDDS survey to  
30  
31 identify co-existing conditions including- cardiovascular (ICD-9-CM codes, 410.xx – 414.xx,  
32  
33 428.xx, 431.xx, 434.xx, and 436.xx), peripheral vascular (443.9), diabetes (250.xx, 357.2,  
34  
35 362.01), depression (311.xx, 300.4, 296.20, 296.80, 296.89, 296.90), and hypertension (401.x).  
36  
37 In addition to the diagnostic codes, we classified hypertension in patients using the 140/90 mm  
38  
39 Hg per ACC/AHA guideline.<sup>19</sup> We also extracted body mass index (BMI) data within six months  
40  
41 of the PDDS survey completion date.  
42  
43  
44  
45  
46  
47

### 48 **Statistical Analysis**

49  
50 We used multivariable regression analysis to examine the relationship between SBP  
51  
52 variability and the PDDS disability rating. To best utilize the ordinal nature of our response  
53  
54 variable (PDDS score)<sup>16,17</sup>, we estimated an ordinal logistic regression<sup>20</sup> and found that it did not  
55  
56  
57  
58  
59  
60



1  
2  
3 satisfy the proportional odds assumption.<sup>20,21</sup> We tried several groupings to satisfy the  
4  
5 assumption and decided on three groups based on the PDDS scores as follows: No or Mild  
6  
7 Disability (PDDS scores 0 or 1), Moderate Disability (PDDS scores 2 or 3), and Severe  
8  
9 Disability (PDDS scores 4 or higher). The disability outcomes in these new groups were  
10  
11 modeled using ordinal logistic regression as a function of SBP variability, adjusting for patient  
12  
13 demographic data (age, sex, and race/ethnicity) and mean SBP.  
14  
15

16  
17  
18 As a sensitivity analysis, we estimated two additional models. First, we defined the  
19  
20 PDDS score 3 or above as presence of severe disability and modeled the binary response (0 = No  
21  
22 or Mild Disability; 1 = Moderate to Severe Disability) using a logistic regression (Table 4).  
23  
24 Second, we treated the PDDS score as a continuous variable and estimated a linear regression  
25  
26 that are identically specified as the ordinal logistic regression model (Table 5).  
27  
28

29  
30 We further tested whether co-existing conditions affect the association by including  
31  
32 depression, hypertension, and sleep disturbances as additional control variables (Table e-1).  
33  
34 Because SBP variability is found to be correlated with the number of measures used in  
35  
36 computing the within-subject standard deviations, we controlled for the number of BP measures  
37  
38 in another sensitivity analysis (Table e-2).  
39  
40

41  
42 Finally, we tested whether PDDS scores can predict SBP variability before the study  
43  
44 (Table e-3) and whether PDDS scores can predict SBP variability after the survey (Table e-4) by  
45  
46 estimating linear regressions to predict pre- and post-survey SBP variability as a function of  
47  
48 PDDS scores, adjusting for age, sex, race, and other covariates.  
49  
50

51  
52 We used Stata SE v. 15.1 (StataCorp, College Station, TX) for all statistical analysis.  
53  
54

### 55 **3. Results**

56  
57  
58  
59  
60

1  
2  
3 A total of 218 PDDS surveys were identified from available study data. Among these, 17  
4 subjects had completed more than one PDDS survey; in such cases, the first available survey  
5 date with corresponding  $\geq 3$  SBP measures was utilized. No subject contributed more than once  
6 to the final data set. Of the resultant subjects, only 94 had the requisite  $\geq 3$  blood pressure  
7 measures in the 12-months prior to the survey completion date. Two additional subjects were  
8 excluded due to lack of available records to permit BMI calculation (absent height and/or  
9 weight).

10  
11 The resultant 92 subjects included in the final analysis had a mean age of  $44.7 \pm 12.2$  years  
12 at the time of PDDS survey completion. They were predominantly white (82.6%) and 54%  
13 female. Their mean SBP was  $124.1 \pm 13.2$  mm Hg overall and were highest in Tertile 1  
14 ( $128.0 \pm 13.0$  mm Hg) and lowest in Tertile 2 ( $125.8 \pm 13.0$  mm Hg). Their within-subject SBP  
15 standard deviation was  $9.9 \pm 4.6$  mm Hg overall but changed from  $5.8 \pm 2.1$  mm Hg (interquartile  
16 range [IQR] 4.4 – 7.4 mm Hg) to  $9.2 \pm 1.4$  mm Hg (IQR 11.7 – 17.7 mm Hg) in Tertile 2, and  
17  $14.8 \pm 3.9$  (IQR 8.5 – 10.2 mm Hg) in Tertile 3. Their mean BMI was  $29.0$  kg/m<sup>2</sup>. A total of 19  
18 (20.7%) had depression, 28 (30.4%) had hypertension (11 patients with a diagnosis in ICD-9-CM  
19 and 17 patients with elevated mean BP). We could not identify any subject with vascular  
20 comorbidities except for one who had acute myocardial infarction and was in Tertile 2. For this  
21 reason, vascular comorbidities have not been used in any subsequent analyses. The mean and  
22 median PDDS score was  $2.2 \pm 1.89$  and 2 (IQR 0 – 4). Forty patients (43.5%) had no or mild  
23 disability, 27 (29.4%) had moderate disability, and 25 (27.2%) had severe disability (Table 1).

24  
25 Participants included in the analysis were not significantly different from those excluded  
26 (n = 126) in terms of PDDS score, patient sex, race and body mass index (Table 2). However,

1  
2  
3 included subjects were older (48.7 vs 44.7 years;  $p = 0.016$ ), less hypertensive (30.4% vs 52.4%;  
4  
5  $p = 0.001$ ) and more depressed (20.7% vs 5.6%;  $p < 0.001$ ).  
6

7  
8 Results from multivariable analyses are shown in Table 3, Compared to subjects in  
9  
10 Tertile 1 (lowest variability), those in Tertile 2 were 3.8 times more likely (OR = 3.77; 95% CI,  
11  
12 1.20 – 11.87;  $p = 0.023$ ) and those in Tertile 3 (highest variability) were 5.5 times more likely  
13  
14 (OR = 5.48; 95% CI, 1.65 – 18.15;  $p = 0.005$ ) to be in a higher disability group, independent of  
15  
16 mean SBP, age, sex, and race/ethnicity. This relationship did not significantly change when BMI  
17  
18 and other comorbidities such as hypertension and depression were included in the model (Table  
19  
20 e-1).  
21  
22

23  
24 For sensitivity analyses, we checked the robustness of this association by estimating a  
25  
26 logistic regression that predicted the binary indicator of PDDDS score 3 or above (moderate or  
27  
28 severe disability) and a linear regression that predicted the original PDDDS score as a continuous  
29  
30 variable (Tables 4 and 5). All sensitivity analyses showed that the significant gradient  
31  
32 relationship between SBP variability and disability ratings assessed by PPDS scale persisted.  
33  
34

35  
36 We checked whether the number of SBP measures used to compute the variability is a  
37  
38 confounding factor between the variability and the PDDDS outcome by estimating the model  
39  
40 shown in Table 2 with the number of measures as an additional covariate (Table e-2). The  
41  
42 significant gradient relationship persisted in this model as well ( $p$  for trend = 0.007).  
43  
44

45  
46 Finally, we tested the potential multi-directionality of the relationship between PDDDS  
47  
48 scores and SBP variability by predicting the SBP variability before and after the study using  
49  
50 PDDDS scores. From the 92 included subjects, 89 subjects had available  $\geq 3$  three post-survey SBP  
51  
52 measures, for whom the pre- and post-survey SBP coefficients of variation were correlated at  $r =$   
53  
54 0.10 ( $p = 0.349$ ), while SBP means were correlated at  $r = 0.83$  ( $p < 0.001$ ). We estimated two  
55  
56  
57  
58  
59

1  
2  
3 regression models that predict pre-survey and post-survey SBP coefficient of variation using  
4 PDDS scores, after controlling for age, sex, and race. PDDS scores did not predict pre-survey  
5 variability in any model specification (Table e-3). On the other hand, those with moderate  
6 disability had 0.03 higher post-survey coefficient of variation in SBP (95% CI, 0.01 – 0.05;  $p =$   
7 0.003) compared to those with no or mild disability but the severe disability group did not have  
8 significantly different SBP variability from the no or mild group. Mean SBP, number of BP  
9 measures, or any other comorbidities did not change this association (Table e-4). These tests of  
10 directionality of the association between SBP variability and PDDS scores are summarized in  
11 Figure 1.  
12  
13  
14  
15  
16  
17  
18  
19  
20  
21  
22  
23

#### 24 **4. Discussion**

25  
26  
27 Our results demonstrate a significant and strong graded relationship between SBP  
28 variability and self-reported disability outcome measures (PDDS) among MS patients. Patients in  
29 Tertile 3 (highest variability) had an approximately six times higher risk of being in the higher  
30 disability group compared to those in Tertile 1 (lowest variability). This relationship was  
31 independent of age, sex, race/ethnicity, and mean SBP. This result was robust to different  
32 analytic methods such as logistic regression to predict PDDS score 3 or higher (presence of  
33 moderate to severe disability) and ordinary least squares regression that predicted the PDDS  
34 score as a continuous outcome.  
35  
36  
37  
38  
39  
40  
41  
42  
43  
44  
45

46 Another important finding in this study is that the association of excessive SBP  
47 variability with higher PDDS scores can occur in normotensive individuals. Indeed, overall, 70%  
48 of our cohort were normotensive ( $< 140/90$  mm Hg) or without hypertension diagnosis. They  
49 also had lower rates of hypertension in higher SBP variability tertiles with the lowest proportion  
50 observed in Tertile 3 (19% vs 41% in Tertile 1), a group with the highest SBP variability. This  
51  
52  
53  
54  
55  
56  
57  
58  
59  
60

1  
2  
3 finding is consistent with previous studies by Sohn and his colleagues on diabetic  
4 complications.<sup>8,11,12</sup> Our results also demonstrate that mean SBP was not significantly associated  
5 with PDDS groups, suggesting there may be a different physiologic mechanism at play, not  
6 simply elevated blood pressures.<sup>13</sup>  
7  
8  
9  
10  
11  
12

13 Excessive visit-to-visit SBP variability has been associated with cardiovascular and  
14 several other health outcomes. To our knowledge, this is the first study to show that excessive  
15 visit-to-visit SBP variability may be a risk factor to MS disability progression. Previously,  
16 several large studies have identified a relationship between vascular comorbidities and MS  
17 outcomes, both clinical and patient-reported, using diagnostic codes (e.g., hypertension) or  
18 medications (anti-hypertensives) to classify patients.<sup>1-4</sup> Our results confirm the previous  
19 diagnosis-based research and extends that work, by identifying excessive SBP variability as a  
20 contributing factor to the previously identified relationship between blood-pressure changes and  
21 MS. Our results further suggest that a relevant hemodynamic mechanism in the interplay  
22 between cardiovascular disease and MS disability progression, is not simply hypertension (i.e.,  
23 elevated mean BP), but also excessive SBP variability.  
24  
25  
26  
27  
28  
29  
30  
31  
32  
33  
34  
35  
36  
37  
38

39 Pathophysiological mechanisms involved in the relationship between blood pressure  
40 variability and health outcomes are currently explained by arterial stiffness, endothelial  
41 dysfunction, and subclinical inflammation.<sup>22-25</sup> Several factors known to increase blood pressure  
42 variability include autonomic dysfunction<sup>26</sup>, low hydration status<sup>27</sup>, insulin dysregulation<sup>28,29</sup> and  
43 sleep-apnea<sup>30</sup> are commonly found in patients with MS. Tettey et al. suggests that vascular  
44 comorbidities may activate the inflammatory cascade that ultimately leads to neurodegeneration  
45 which manifests in disability progression in MS.<sup>2</sup> They also suggested that cerebral endothelial  
46 dysfunction may be involved in “trans-endothelial migration of T-lymphocytes and monocytes to  
47  
48  
49  
50  
51  
52  
53  
54  
55  
56  
57  
58  
59  
60

1  
2  
3 the CNS with destructive and often neurodegenerative consequences.”<sup>2</sup> Our results suggest that  
4 excessive SBP variability could be a relevant factor in that postulated inflammatory cascade in  
5 the vasculature and that may contribute to the cerebral endothelial dysfunction, which combine  
6 to produce the MS disability progression we observed in our study. More research is needed to  
7 test whether excessive SBP variability is indeed implicated in these pathways.  
8  
9  
10  
11  
12  
13

14 It is still premature to derive any MS-related clinical implications from our results. But it  
15 is advisable that MS patients be checked for SBP variability and those with excessive variability  
16 (e.g., within-subject standard deviation of 8 or higher) be recommended for careful vascular  
17 evaluation. Interestingly, we found that the majority of patients we identified as having  
18 hypertension according to the JNC7<sup>31</sup> and 2017 ACC/AHA criteria<sup>19</sup> did not have an actual  
19 diagnosis of hypertension. This suggests a potential under-diagnosis of hypertension, at least in  
20 our cohort.  
21  
22  
23  
24  
25  
26  
27  
28  
29  
30

31 This cross-sectional study was not designed to make any causal inferences between SBP  
32 variability and PDDS scores. However, our sensitivity analyses suggest that, while SBP  
33 variability was a strong and significant predictor of PDDS scores, the latter did not predict the  
34 former. Our data further suggest that the PDDS scores could significantly predict post-survey  
35 SBP variability but that the pre- and post-survey SBP variabilities were not correlated ( $r = 0.10$ ;  
36  $p = 0.349$ ). This lends credence to the notion that SBP variability can in fact be a prognostic  
37 factor for future disability progression and that there may be a vicious cycle of increasing SBP  
38 variability and worsening disability feeding each other dynamically over time.  
39  
40  
41  
42  
43  
44  
45  
46  
47  
48  
49

50 There are limitations to our work. This is a retrospective study in design and we relied on  
51 the CDR for our health system as a source of blood pressure measures and comorbid conditions.  
52 Accuracy of these values is not known. Second, we were limited in sample size, mainly because  
53  
54  
55  
56  
57  
58  
59  
60

1  
2  
3 the majority of patients in the original study sample were excluded because they lacked the  
4  
5 requisite number of SBP measures. A bivariate comparison of the included vs excluded patients  
6  
7 in Table 2 showed that they are similar in demographic factors, with the noted exception of age  
8  
9 and depression, both of which were higher in the included population. These factors may have  
10  
11 resulted in higher visit frequency leading to more available SBP values in those meeting  
12  
13 eligibility criteria. Interestingly, the included population had lower incidence of hypertension  
14  
15 compared to excluded subjects, as identified by ICD-9-CM codes or BP measures taken during  
16  
17 the one-year period prior to the survey completion. We were only able to capture BP measures  
18  
19 documented in our institutional electronic-medical records and there may have been additional  
20  
21 values measured by other providers that were not captured in our data. In addition, while  
22  
23 validated, PDDS is a patient-reported outcome that may have unknown response bias. Despite  
24  
25 these limitations, we believe our results represent an important first step in studying this  
26  
27 relationship.  
28  
29  
30  
31  
32

33  
34 In conclusion, our results show that excessive SBP variability is associated with  
35  
36 increased disability in MS patients, independent of mean SBP, hypertension diagnosis,  
37  
38 depression, and obesity. This may represent a novel mechanism which may mediate the  
39  
40 relationship between vascular dysfunction and progression of MS disability. Further prospective  
41  
42 studies are needed to confirm whether excessive SBP variability is linked to the subclinical  
43  
44 inflammation markers and/or cerebral endothelial dysfunction, and other markers of disease  
45  
46 progression.  
47  
48  
49  
50  
51  
52  
53  
54  
55  
56  
57  
58  
59  
60

### **Declaration of Conflicting Interests**

Myla D. Goldman has served as a consultant for ADAMAS, Celgene, EMD Serono, Novartis Pharmaceuticals, Sanofi Genzyme, Teva Pharmaceuticals. She has received research funding from Biogen Idec, Novartis Pharmaceuticals, National MS Society, MedDay Pharmaceuticals, and PCORI.

Seulgi Min reports no disclosures.

Jennifer M. Lobo reports no disclosures.

Min-Woong Sohn reports no disclosures.

### **Funding**

This research did not receive any specific grant from funding agencies in the public, commercial, or not-for-profit sectors. This work was supported by philanthropic funds provided by the ziMS Foundation.

### **Data Availability Statement**

Anonymized data not published within this article are available from the corresponding author (MDG) on reasonable request.

### **Author Statement**

Myla D. Goldman, MD, MSc - Study concept and design, acquisition of data, analysis and interpretation of data, and drafting/revising the manuscript

Seulgi Min, BA - Acquisition of data, drafting/revising the manuscript

Jennifer M. Lobo, PhD - Diagram creation, drafting/revising the manuscript

Min-Woong Sohn, PhD - Study concept and design, analysis and interpretation of data, statistical analysis, and drafting/revising the manuscript



Figure 1. Summary of the significant relationships (solid arrows) and nonsignificant relationships (dashed arrows) between SBP variability and PDDS scores

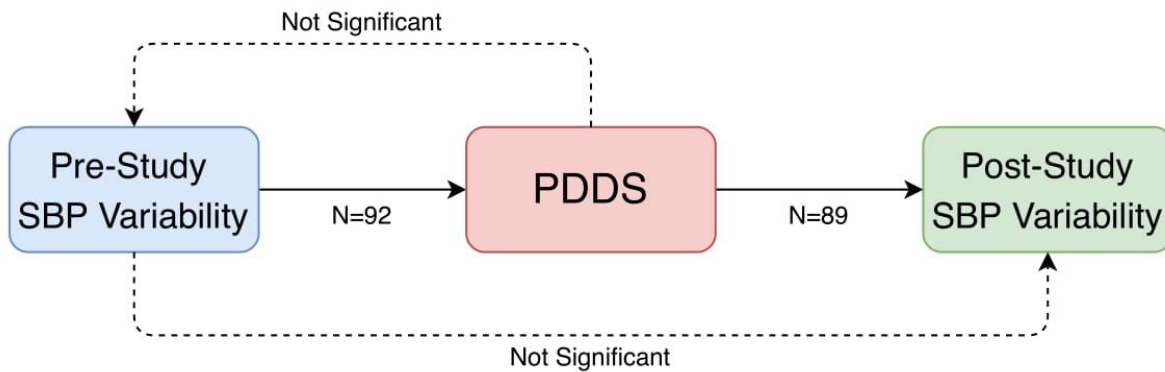

\* Pre-survey SBP variability was significantly predictive of PDDS score ( $p = 0.015$ ), and PDDS scores were predictive of Post-survey SBP variability ( $p = 0.011$ ). PDDS scores did not predict pre-survey SBP variability, and pre-survey SBP variability did not predict post-study SBP variability. The p-values were obtained from a Wald test with 2 degrees of freedom (Pre-survey variability to PDDS) and from an F test with 2 and 83 degrees of freedom (PDDS to Post-survey variability).

Table 1. Characteristics of Study Cohort (N = 92) \*

| Variable                                        | Tertiles of SBP coefficient of variation |                        |                |                         | P-Value |
|-------------------------------------------------|------------------------------------------|------------------------|----------------|-------------------------|---------|
|                                                 | All                                      | 1 (Lowest Variability) | 2              | 3 (Highest Variability) |         |
|                                                 | N (%)                                    | N (%)                  | N (%)          | N (%)                   |         |
| All, n (Row %)                                  | 92 (100.00%)                             | 31 (33.70%)            | 30 (32.61%)    | 31 (33.70%)             |         |
| Age, mean (SD)                                  | 44.71 (12.16)                            | 45.03 (14.29)          | 45.93 (12.54)  | 43.19 (9.41)            | 0.673   |
| Female                                          | 50 (54.35%)                              | 18 (58.06%)            | 20 (66.67%)    | 12 (38.71%)             | 0.080   |
| White Race                                      | 76 (82.61%)                              | 29 (93.55%)            | 25 (83.33%)    | 22 (70.97%)             | 0.063   |
| Within-subject SBP                              |                                          |                        |                |                         |         |
| Mean (mm Hg), mean (SD)                         | 124.05 (13.19)                           | 128.01 (12.98)         | 118.16 (11.86) | 125.78 (13.00)          | 0.008   |
| Standard deviation (mm Hg), mean (SD)           | 9.94 (4.59)                              | 5.82 (2.05)            | 9.17 (1.41)    | 14.79 (3.91)            | < 0.001 |
| Maximum (mm Hg), mean (SD)                      | 137.95 (15.11)                           | 135.74 (13.70)         | 132.60 (12.37) | 145.32 (16.34)          | 0.002   |
| Minimum (mm Hg), mean (SD)                      | 110.68 (14.19)                           | 120.45 (13.11)         | 105.43 (11.24) | 106.00 (12.95)          | < 0.001 |
| Number of measures, mean (SD)                   | 7.93 (5.53)                              | 6.29 (3.97)            | 10.33 (6.18)   | 7.26 (5.57)             | 0.011   |
| Body mass index (kg/m <sup>2</sup> ), mean (SD) | 29.03 (6.02)                             | 28.73 (5.64)           | 28.04 (5.25)   | 30.28 (6.99)            | 0.330   |
| Depression                                      | 19 (20.65%)                              | 4 (12.90%)             | 11 (36.67%)    | 4 (12.90%)              | 0.031   |
| Hypertension                                    | 28 (30.43%)                              | 13 (41.94%)            | 9 (30.00%)     | 6 (19.35%)              | 0.154   |
| PDDS Score, mean (SD)                           | 2.22 (1.89)                              | 1.52 (1.95)            | 2.73 (1.70)    | 2.42 (1.86)             | 0.031   |
| PDDS Score, median (Interquartile Range)        | 2 (0 – 4)                                | 0 (0 – 3)              | 3 (1 – 4)      | 2 (1 - 4)               |         |
| PDDS Score (3 Groups)                           |                                          |                        |                |                         |         |
| No or Mild (0, 1)                               | 40 (43.48%)                              | 19 (61.29%)            | 9 (30.00%)     | 12 (38.71%)             | 0.163   |
| Moderate (2, 3)                                 | 27 (29.35%)                              | 6 (19.35%)             | 11 (36.67%)    | 10 (32.26%)             |         |
| Severe (4 or higher)                            | 25 (27.17%)                              | 6 (19.35%)             | 10 (33.33%)    | 9 (29.03%)              |         |

\* SBP = systolic blood pressure; SD = standard deviation; PDDS = patient determined disease steps. All percentages are either column percentages (Col %) or row percentages (Row %). P-values for continuous variables were computed using one-way ANOVA and those for categorical variables were based on Pearson chi-square tests.

Table 2. Comparison of the included and excluded patients in the original cohort\*

| Variables                           | All           | Excluded      | Included      | P-Value |
|-------------------------------------|---------------|---------------|---------------|---------|
|                                     | N (Col %)     | N (Row %)     | N (Row %)     |         |
| All                                 | 218 (100.00%) | 126 (57.80%)  | 92 (42.20%)   |         |
| Age, mean (SD)                      | 47.04 (12.24) | 44.71 (12.16) | 48.74 (12.06) | 0.016   |
| Female                              | 113 (51.83%)  | 63 (50.00%)   | 50 (54.35%)   | 0.526   |
| White Race                          | 181 (83.03%)  | 105 (83.33%)  | 76 (82.61%)   | 0.888   |
| BMI (kg/m <sup>2</sup> ), mean (SD) | 28.25 (6.19)  | 29.03 (6.02)  | 27.59 (6.29)  | 0.102   |
| Hypertension                        | 94 (43.12%)   | 66 (52.38%)   | 28 (30.43%)   | 0.001   |
| Diabetes                            | 6 (2.75%)     | 4 (3.17%)     | 2 (2.17%)     | 0.656   |
| Depression                          | 26 (11.93%)   | 7 (5.56%)     | 19 (20.65%)   | < 0.001 |
| PDDS Score, mean (SD)               | 2.05 (1.81)   | 2.22 (1.89)   | 1.93 (1.75)   | 0.247   |
| PDDS Score (3 Groups)               |               |               |               |         |
| No or Mild (0, 1)                   | 95 (43.58%)   | 55 (43.65%)   | 40 (43.48%)   | 0.212   |
| Moderate (2, 3)                     | 75 (34.40%)   | 48 (38.10%)   | 27 (29.35%)   |         |
| Severe (4 or higher)                | 48 (22.02%)   | 23 (18.25%)   | 25 (27.17%)   |         |

\* SD = standard deviation; BMI = body mass index; PDDS = patient determined disease steps.

Table 3. Ordinal logistic regression results for MS patients in a higher disability group (N = 92)\*

| Variables                                         | OR (95% CI)            | P-Value |
|---------------------------------------------------|------------------------|---------|
| SBP variability tertiles [1 (Lowest Variability)] |                        |         |
| 2                                                 | 3.774 (1.200 - 11.865) | 0.023   |
| 3 (Highest Variability)                           | 5.477 (1.653 - 18.148) | 0.005   |
| Age                                               | 1.096 (1.049 - 1.145)  | < 0.001 |
| Female [ Male]                                    | 2.993 (1.197 - 7.484)  | 0.019   |
| White Race [Other race/ethnicity]                 | 1.331 (0.412 - 4.299)  | 0.633   |
| Within-subject mean SBP (mm Hg)                   | 1.004 (0.970 - 1.040)  | 0.807   |

\* Disability groups were defined as No or Mild (PDDS scores 0 or 1), Moderate (2 or 3), and Severe (4 or higher). Reference groups are in angle brackets.

Table 4. Logistic regression results for patients having PDDS scores  $\geq 3$  (N = 92)\*

| Variable                                          | Model 1                |         | Model 2                |         | Model 3                |         |
|---------------------------------------------------|------------------------|---------|------------------------|---------|------------------------|---------|
|                                                   | OR (95% CI)            | P-Value | OR (95% CI)            | P-Value | OR (95% CI)            | P-Value |
| SBP variability tertiles [1 (Lowest Variability)] |                        |         |                        |         |                        |         |
| 2                                                 | 7.098 (1.745 - 28.862) | 0.006   | 7.767 (1.822 - 33.105) | 0.006   | 7.662 (1.783 - 32.928) | 0.006   |
| 3 (Highest Variability)                           | 4.564 (1.210 - 17.213) | 0.025   | 4.338 (1.124 - 16.749) | 0.033   | 4.273 (1.106 - 16.514) | 0.035   |
| Age                                               | 1.106 (1.047 - 1.168)  | < 0.001 | 1.107 (1.047 - 1.170)  | < 0.001 | 1.109 (1.048 - 1.174)  | < 0.001 |
| Female [ Male]                                    | 2.079 (0.718 - 6.020)  | 0.177   | 2.186 (0.741 - 6.444)  | 0.156   | 2.215 (0.751 - 6.536)  | 0.150   |
| White Race [Other race/ethnicity]                 | 1.972 (0.446 - 8.723)  | 0.371   | 1.867 (0.427 - 8.159)  | 0.407   | 1.984 (0.445 - 8.835)  | 0.369   |
| Within-subject mean SBP (mm Hg)                   | 1.003 (0.962 - 1.045)  | 0.901   | 1.002 (0.961 - 1.044)  | 0.929   | 0.994 (0.947 - 1.044)  | 0.818   |
| Hypertension                                      |                        |         | 0.637 (0.199 - 2.038)  | 0.447   | 0.605 (0.188 - 1.950)  | 0.400   |
| Depression                                        |                        |         | 0.632 (0.179 - 2.230)  | 0.476   | 0.617 (0.174 - 2.188)  | 0.454   |
| Body mass index (kg/m <sup>2</sup> )              |                        |         |                        |         | 1.032 (0.932 - 1.143)  | 0.542   |
| Pseudo R <sup>2</sup>                             | 0.265                  |         | 0.273                  |         | 0.276                  |         |
| Hosmer-Lemeshow Test (df), p-value                | 2.691 (8); p = 0.9522  |         | 7.885 (8); p = 0.4448  |         | 6.6506 (8); p = 0.5748 |         |
| Area under the ROC Curve                          | 0.823                  |         | 0.826                  |         | 0.831                  |         |
| AIC                                               | 107.184                |         | 110.186                |         | 111.814                |         |
| BIC                                               | 124.836                |         | 132.883                |         | 137.032                |         |

\* PDDS = patient determined disease steps; SBP = systolic blood pressure. AIC = Akaike information criterion; BIC = Bayesian information criterion. Reference groups are in angle brackets. P-values in these sensitivity analyses were NOT corrected for multiple comparison.

Table 5. Ordinary least squares models to predict PDDS scores (N = 92)\*

| Variable                                          | Model 1                 |         | Model 2                 |         | Model 3                 |         |
|---------------------------------------------------|-------------------------|---------|-------------------------|---------|-------------------------|---------|
|                                                   | Estimate (95% CI)       | P-Value | Estimate (95% CI)       | P-Value | Estimate (95% CI)       | P-Value |
| Intercept                                         | -2.524 (-5.944 - 0.896) | 0.146   | -2.536 (-6.032 - 0.961) | 0.153   | -2.556 (-6.069 - 0.958) | 0.152   |
| SBP variability tertiles [1 (Lowest Variability)] |                         |         |                         |         |                         |         |
| 2                                                 | 1.132 (0.280 - 1.985)   | 0.010   | 1.153 (0.263 - 2.044)   | 0.012   | 1.128 (0.228 - 2.028)   | 0.015   |
| 3 (Highest Variability)                           | 1.245 (0.426 - 2.065)   | 0.003   | 1.247 (0.402 - 2.092)   | 0.004   | 1.213 (0.355 - 2.072)   | 0.006   |
| Age                                               | 0.074 (0.045 - 0.104)   | < 0.001 | 0.075 (0.045 - 0.105)   | < 0.001 | 0.075 (0.045 - 0.105)   | < 0.001 |
| Female [ Male]                                    | 0.630 (-0.056 - 1.316)  | 0.071   | 0.625 (-0.071 - 1.321)  | 0.078   | 0.623 (-0.076 - 1.322)  | 0.080   |
| White Race [Other race/ethnicity]                 | 0.371 (-0.553 - 1.294)  | 0.427   | 0.363 (-0.575 - 1.302)  | 0.443   | 0.393 (-0.556 - 1.342)  | 0.413   |
| Within-subject mean SBP (mm Hg)                   | 0.000 (-0.028 - 0.028)  | 0.990   | 0.000 (-0.028 - 0.028)  | 0.996   | -0.004 (-0.036 - 0.028) | 0.805   |
| Hypertension                                      |                         |         | 0.016 (-0.718 - 0.750)  | 0.965   | -0.009 (-0.751 - 0.734) | 0.982   |
| Depression                                        |                         |         | -0.079 (-0.925 - 0.766) | 0.853   | -0.085 (-0.935 - 0.764) | 0.842   |
| Body mass index (kg/m <sup>2</sup> )              |                         |         |                         |         | 0.017 (-0.047 - 0.080)  | 0.597   |
| R <sup>2</sup>                                    | 0.368                   |         | 0.368                   |         | 0.370                   |         |
| Adjusted R <sup>2</sup>                           | 0.323                   |         | 0.307                   |         | 0.301                   |         |
| AIC                                               | 351.224                 |         | 355.183                 |         | 356.868                 |         |
| BIC                                               | 371.398                 |         | 380.400                 |         | 384.607                 |         |

\* PDDS = patient determined disease steps; SBP = systolic blood pressure. AIC = Akaike information criterion; BIC = Bayesian information criterion. Reference groups are in angle brackets. P-values in these sensitivity analyses were NOT corrected for multiple comparison.

## REFERENCES

1. Dagan A, Gringouz I, Kliens I, Segal G. Disability Progression in Multiple Sclerosis Is Affected by the Emergence of Comorbid Arterial Hypertension. *J Clin Neurol*. 2016;12(3):345-350.
2. Tettey P, Simpson S, Jr., Taylor BV, van der Mei IA. Vascular comorbidities in the onset and progression of multiple sclerosis. *Journal of the neurological sciences*. 2014;347(1-2):23-33.
3. Marrie R, Rudick R, Horwitz R, et al. Vascular comorbidity is associated with more rapid disability progression in multiple sclerosis. *Neurology*. 2010;13(74):1041-1047.
4. Conway D, Thompson N, Cohen J. Influence of hypertension, diabetes, hyperlipidemia, and obstructive lung disease on multiple sclerosis disease course *MSJ*. 2016;23:277-285.
5. Marrie R, Horwitz R, Cutter G, Tyry T. Cumulative impact of comorbidity on quality of life in MS. *Acta Neurologica Scandinavica*. 2012;125(3):180-186.
6. Hata J, Arima H, Rothwell PM, et al. Effects of visit-to-visit variability in systolic blood pressure on macrovascular and microvascular complications in patients with type 2 diabetes mellitus: the ADVANCE trial. *Circulation*. 2013;128(12):1325-1334.
7. Rothwell PM, Howard SC, Dolan E, et al. Prognostic significance of visit-to-visit variability, maximum systolic blood pressure, and episodic hypertension. *Lancet*. 2010;375(9718):895-905.
8. Sohn M, Epstein N, Huang E, et al. Visit-to-visit systolic blood pressure variability and microvascular complications among patients with diabetes. *Journal of Diabetes and Its Complications*. 2016;31(1):195-201.
9. Epstein NU, Lane KA, Farlow MR, et al. Cognitive dysfunction and greater visit-to-visit systolic blood pressure variability. *J Am Geriatr Soc*. 2013;61(12):2168-2173.
10. Okada H, Fukui M, Tanaka M, et al. Visit-to-Visit Blood Pressure Variability Is a Novel Risk Factor for the Development and Progression of Diabetic Nephropathy in Patients With Type 2 Diabetes. *Diabetes Care*. 2013;36(7):1908-1912.
11. Budiman-Mak E, Epstein N, Brennan M, et al. Systolic Blood Pressure Variability and Lower Extremity Amputation In a Non-Elderly Diabetic Population. *Diabetes Res Clin Pract*. 2016;144:75-82.
12. Brennan MB, Guihan M, Budiman-Mak E, et al. Increasing SBP variability is associated with an increased risk of developing incident diabetic foot ulcers. *J Hypertens*. 2018.
13. Rothwell PM. Limitations of the usual blood-pressure hypothesis and importance of variability, instability, and episodic hypertension. *Lancet*. 2010;375(9718):938-948.
14. Mancia G, Facchetti R, Parati G, Zanchetti A. Visit-to-visit blood pressure variability, carotid atherosclerosis, and cardiovascular events in the European Lacidipine Study on Atherosclerosis. *Circulation*. 2012;126(5):569-578.
15. Tao Y, Xu J, Song B, et al. Short-term blood pressure variability and long-term blood pressure variability: which one is a reliable predictor for recurrent stroke. *Journal of human hypertension*. 2017;31(9):568-573.
16. Hohol M, Orav E, Weiner H. Disease Steps in multiple sclerosis: A simple approach to evaluate disease progression. *Neurology*. 1995;45:251-255.
17. Hohol M, Orav E, Weiner H. Disease Steps in multiple sclerosis: a longitudinal study comparing disease steps and EDSS to evaluate disease progression. *Multiple Sclerosis*. 1999(5):349-354.
18. Marrie R, Goldman M. Validity of performance scales for disability assessment in multiple sclerosis. *Multiple Sclerosis*. 2007;13(9):1176-1182.
19. Whelton PK, Carey RM. The 2017 American College of Cardiology/American Heart Association Clinical Practice Guideline for High Blood Pressure in Adults. *JAMA Cardiol*. 2018;3(4):352-353.
20. Agresti A. *Categorical data analysis*. 3rd ed. Hoboken, NJ: Wiley; 2012.
21. Brant R. Assessing proportionality in the proportional odds model for ordinal logistic regression. *Biometrics*. 1990;46(4):1171-1178.

- 1  
2  
3 22. Muntner P, Whittle J, Lynch A, Colantonio L, et.al. Visit-to-Visit Variability of Blood Pressure  
4 and Coronary Heart Disease, Stroke, Heart Failure, and Mortality: A Cohort Study. *Annals of*  
5 *Internal Medicine*. 2015;163(5):329-338.
- 6 23. Shimbo D, Shea S, McClelland R, al. e. Associations of aortic distensibility and arterial elasticity  
7 with long-term visit-to-visit blood pressure variability: the Multi-Ethnic Study of Atherosclerosis  
8 (MESA). . *American journal of hypertension*. 2013;23:896–902.
- 9 24. Nagai M, Hoshide S, Ishikawa J, Shimada K, Kario K. Visit-to-visit blood pressure variations:  
10 new independent determinants for carotid artery measures in the elderly at high risk of  
11 cardiovascular disease. . *Journal of the American Society of Hypertension*. 2011;5(3):184–119.
- 12 25. Diaz K, Veerabhadrapa P, Kashem M, al. e. Relationship of visit-to-visit and ambulatory blood  
13 pressure variability to vascular function in African Americans. . *Hypertension research : official*  
14 *journal of the Japanese Society of Hypertension*. 2012;35(5):55-61.
- 15 26. Adamec I, Habek M. Autonomic dysfunction in multiple sclerosis. *clinical neurol neurosurg*.  
16 2013;115:s73-78.
- 17 27. Cincotta MC, Engelhard MM, Stankey M, Goldman MD. Fatigue and fluid hydration status in  
18 multiple sclerosis: A hypothesis. *Multiple Sclerosis Journal*. 2016;22(11):1438-1443.
- 19 28. Penesova A, Vlcek M, Imrich R, et al. Hyperinsulinemia in newly diagnosis patients with  
20 multiple sclerosis. *Metabolic Brain Disease*. 2015;4:895-901.
- 21 29. Goldman M, Koenig S, Yeamans R, Johnston K. A study of Insuling Resistance In Multiple  
22 Sclerosis Subjects and Healthy Controls. *American Academy of Neurology, Abstract P6171*.  
23 2014.
- 24 30. Brass Sea. Sleep disorders in patients with multiple sclerosis. *Sleep Medicine Reviews*.  
25 2010(14):121-129.
- 26 31. Chobanian AV, Bakris GL, Black HR, et al. Seventh report of the Joint National Committee on  
27 Prevention, Detection, Evaluation, and Treatment of High Blood Pressure. *Hypertension*.  
28 2003;42(6):1206-1252.
- 29  
30  
31  
32  
33  
34  
35  
36  
37  
38  
39  
40  
41  
42  
43  
44  
45  
46  
47  
48  
49  
50  
51  
52  
53  
54  
55  
56  
57  
58  
59  
60



Table e-1. Ordinal logistic regression for MS patients in a higher disability group with BMI and comorbid conditions (N = 92)\*

| Variables                                | Estimate (95% CI)      | P-Value |
|------------------------------------------|------------------------|---------|
| Tertiles of SBP coefficient of variation |                        |         |
| 2                                        | 3.480 (1.077 - 11.251) | 0.037   |
| 3 (Highest Variability)                  | 5.193 (1.531 - 17.616) | 0.008   |
| Age                                      | 1.100 (1.051 - 1.150)  | < 0.001 |
| Female                                   | 3.177 (1.249 - 8.078)  | 0.015   |
| White Race                               | 1.495 (0.450 - 4.963)  | 0.512   |
| Within-subject mean SBP (mm Hg)          | 0.991 (0.952 - 1.031)  | 0.647   |
| Hypertension                             | 0.930 (0.356 - 2.430)  | 0.882   |
| Depression                               | 1.183 (0.426 - 3.289)  | 0.747   |
| Body mass index (kg/m <sup>2</sup> )     | 1.057 (0.974 - 1.147)  | 0.186   |

\* SBP = systolic blood pressure. Reference groups are in angle brackets.

Table e-2. Ordinal logistic regression for MS patients in a higher disability group with the number of SBP measures as a covariate (N = 92)\*

| Variables                                        | Estimate (95% CI)      | P-Value |
|--------------------------------------------------|------------------------|---------|
| SBP variability tertiles [1 (Lowest Variability) |                        |         |
| 2                                                | 3.090 (0.959 - 9.956)  | 0.059   |
| 3 (Highest Variability)                          | 5.204 (1.576 - 17.182) | 0.007   |
| Age                                              | 1.101 (1.053 - 1.151)  | 0.000   |
| Female [Male]                                    | 2.598 (1.023 - 6.595)  | 0.045   |
| White Race [Other race/ethnicity]                | 1.333 (0.411 - 4.319)  | 0.632   |
| Within-subject mean SBP (mm Hg)                  | 1.013 (0.977 - 1.050)  | 0.489   |
| Within-subject SBP measures                      | 1.084 (0.990 - 1.188)  | 0.083   |

\* SBP = systolic blood pressure. Reference groups are in angle brackets.

1  
2  
3  
4  
5  
6  
7  
8  
9  
10  
11  
12  
13  
14  
15  
16  
17  
18  
19  
20  
21  
22  
23  
24  
25  
26  
27  
28  
29  
30  
31  
32  
33  
34  
35  
36  
37  
38  
39  
40  
41  
42  
43  
44  
45  
46  
47

Table e-3. Ordinary least squares models to predict SBP variability before the study (N = 92)\*

| Variables                       | Model 1                 |         | Model 2                 |         | Model 2                 |         |
|---------------------------------|-------------------------|---------|-------------------------|---------|-------------------------|---------|
|                                 | Estimate (95% CI)       | P-Value | Estimate (95% CI)       | P-Value | Estimate (95% CI)       | P-Value |
| Intercept                       | 0.098 (0.069 - 0.128)   | 0.000   | 0.042 (-0.027 - 0.110)  | 0.232   | 0.076 (-0.004 - 0.155)  | 0.063   |
| PDDS severity [1 (No or Mild)]  |                         |         |                         |         |                         |         |
| 2 (Moderate)                    | 0.010 (-0.009 - 0.029)  | 0.286   | 0.011 (-0.008 - 0.030)  | 0.256   | 0.009 (-0.011 - 0.029)  | 0.383   |
| 3 (Severe)                      | 0.019 (-0.001 - 0.039)  | 0.059   | 0.019 (-0.001 - 0.040)  | 0.063   | 0.018 (-0.003 - 0.039)  | 0.095   |
| Age (per 100 y)                 | 0.000 (-0.001 - 0.001)  | 0.567   | 0.000 (-0.001 - 0.000)  | 0.340   | 0.000 (-0.001 - 0.000)  | 0.431   |
| Female                          | -0.004 (-0.019 - 0.010) | 0.544   | -0.006 (-0.020 - 0.009) | 0.424   | -0.005 (-0.020 - 0.010) | 0.525   |
| White Race                      | -0.018 (-0.038 - 0.002) | 0.075   | -0.017 (-0.037 - 0.003) | 0.097   | -0.016 (-0.037 - 0.004) | 0.123   |
| Within-subject mean SBP (mm Hg) |                         |         | 0.001 (0.000 - 0.001)   | 0.056   | 0.000 (-0.001 - 0.001)  | 0.666   |
| Within-subject BP measures      |                         |         | 0.000 (-0.001 - 0.001)  | 0.958   | 0.000 (-0.001 - 0.002)  | 0.824   |
| BMI (kg/m <sup>2</sup> )        |                         |         |                         |         | 0.000 (-0.001 - 0.002)  | 0.617   |
| Depression                      |                         |         |                         |         | 0.000 (-0.018 - 0.017)  | 0.972   |
| Sleep Disturbance               |                         |         |                         |         | 0.000 (-0.027 - 0.027)  | 0.982   |
| Hypertension                    |                         |         |                         |         | -0.014 (-0.030 - 0.002) | 0.086   |

\* PDDS = patient determined disease steps; SBP = systolic blood pressure; BMI = body mass index. Reference groups are in angle brackets.

Table e-4. Ordinary least squares models to predict SBP variability post study (N = 89)\*

| Variables                       | Model 1                 |         | Model 2                 |         | Model 2                 |         |
|---------------------------------|-------------------------|---------|-------------------------|---------|-------------------------|---------|
|                                 | Estimate (95% CI)       | P-Value | Estimate (95% CI)       | P-Value | Estimate (95% CI)       | P-Value |
| Intercept                       | 0.072 (0.041 - 0.103)   | < 0.001 | 0.008 (-0.069 - 0.084)  | 0.840   | 0.004 (-0.075 - 0.082)  | 0.928   |
| PDDS scores [1 (No or Mild)]    |                         |         |                         |         |                         |         |
| 2 (Moderate)                    | 0.031 (0.011 - 0.051)   | 0.003   | 0.030 (0.010 - 0.050)   | 0.004   | 0.028 (0.007 - 0.049)   | 0.010   |
| 3 (Severe)                      | 0.021 (0.000 - 0.042)   | 0.052   | 0.018 (-0.004 - 0.040)  | 0.101   | 0.018 (-0.004 - 0.040)  | 0.113   |
| Age (per 100 y)                 | 0.001 (-0.076 - 0.077)  | 0.990   | -0.005 (-0.082 - 0.072) | 0.892   | -0.006 (-0.086 - 0.074) | 0.884   |
| Female                          | -0.007 (-0.023 - 0.008) | 0.357   | -0.009 (-0.024 - 0.007) | 0.265   | -0.009 (-0.024 - 0.007) | 0.278   |
| White Race                      | -0.005 (-0.026 - 0.016) | 0.655   | -0.002 (-0.023 - 0.019) | 0.862   | -0.002 (-0.023 - 0.020) | 0.873   |
| Within-subject mean SBP (mm Hg) |                         |         | 0.000 (0.000 - 0.001)   | 0.103   | 0.000 (0.000 - 0.001)   | 0.236   |
| Within-subject BP measures      |                         |         | 0.001 (0.000 - 0.002)   | 0.228   | 0.001 (-0.001 - 0.002)  | 0.393   |
| BMI (kg/m <sup>2</sup> )        |                         |         |                         |         | 0.000 (-0.001 - 0.002)  | 0.539   |
| Depression                      |                         |         |                         |         | 0.011 (-0.008 - 0.030)  | 0.272   |
| Sleep Disturbance               |                         |         |                         |         | 0.005 (-0.022 - 0.032)  | 0.709   |
| Hypertension                    |                         |         |                         |         | 0.001 (-0.016 - 0.018)  | 0.875   |

\* PDDS = patient determined disease steps; SBP = systolic blood pressure; BMI = body mass index. Reference groups are in angle brackets.

# Reporting checklist for cohort study.

Based on the STROBE cohort guidelines.

## Instructions to authors

Complete this checklist by entering the page numbers from your manuscript where readers will find each of the items listed below.

Your article may not currently address all the items on the checklist. Please modify your text to include the missing information. If you are certain that an item does not apply, please write "n/a" and provide a short explanation.

Upload your completed checklist as an extra file when you submit to a journal.

In your methods section, say that you used the STROBE cohort reporting guidelines, and cite them as:

von Elm E, Altman DG, Egger M, Pocock SJ, Gøtzsche PC, Vandenbroucke JP. The Strengthening the Reporting of Observational Studies in Epidemiology (STROBE) Statement: guidelines for reporting observational studies.

|                           |                     |                                                                                    | Page   |
|---------------------------|---------------------|------------------------------------------------------------------------------------|--------|
|                           |                     | Reporting Item                                                                     | Number |
| <b>Title and abstract</b> |                     |                                                                                    |        |
| Title                     | <a href="#">#1a</a> | Indicate the study's design with a commonly used term in the title or the abstract | 1      |
| Abstract                  | <a href="#">#1b</a> | Provide in the abstract an informative and balanced summary                        | 2      |

of what was done and what was found

## Introduction

Background / [#2](#) Explain the scientific background and rationale for the 3  
 rationale investigation being reported

Objectives [#3](#) State specific objectives, including any prespecified 3  
 hypotheses

## Methods

Study design [#4](#) Present key elements of study design early in the paper 4

Setting [#5](#) Describe the setting, locations, and relevant dates, including 4  
 periods of recruitment, exposure, follow-up, and data collection

Eligibility criteria [#6a](#) Give the eligibility criteria, and the sources and methods of 4  
 selection of participants. Describe methods of follow-up.

Eligibility criteria [#6b](#) For matched studies, give matching criteria and number of N/A  
 exposed and unexposed

Variables [#7](#) Clearly define all outcomes, exposures, predictors, potential 4-5  
 confounders, and effect modifiers. Give diagnostic criteria, if  
 applicable

Data sources / [#8](#) For each variable of interest give sources of data and details of 4-5  
 measurement methods of assessment (measurement). Describe  
 comparability of assessment methods if there is more than one  
 group. Give information separately for for exposed and  
 unexposed groups if applicable.

|    |                |                      |                                                                   |     |
|----|----------------|----------------------|-------------------------------------------------------------------|-----|
| 1  | Bias           | <a href="#">#9</a>   | Describe any efforts to address potential sources of bias         | 5-6 |
| 2  |                |                      |                                                                   |     |
| 3  |                |                      |                                                                   |     |
| 4  | Study size     | <a href="#">#10</a>  | Explain how the study size was arrived at                         | 4   |
| 5  |                |                      |                                                                   |     |
| 6  |                |                      |                                                                   |     |
| 7  | Quantitative   | <a href="#">#11</a>  | Explain how quantitative variables were handled in the            | 4-5 |
| 8  | variables      |                      | analyses. If applicable, describe which groupings were chosen,    |     |
| 9  |                |                      | and why                                                           |     |
| 10 |                |                      |                                                                   |     |
| 11 |                |                      |                                                                   |     |
| 12 |                |                      |                                                                   |     |
| 13 |                |                      |                                                                   |     |
| 14 |                |                      |                                                                   |     |
| 15 | Statistical    | <a href="#">#12a</a> | Describe all statistical methods, including those used to control | 5-6 |
| 16 | methods        |                      | for confounding                                                   |     |
| 17 |                |                      |                                                                   |     |
| 18 |                |                      |                                                                   |     |
| 19 |                |                      |                                                                   |     |
| 20 | Statistical    | <a href="#">#12b</a> | Describe any methods used to examine subgroups and                | 5-6 |
| 21 | methods        |                      | interactions                                                      |     |
| 22 |                |                      |                                                                   |     |
| 23 |                |                      |                                                                   |     |
| 24 |                |                      |                                                                   |     |
| 25 |                |                      |                                                                   |     |
| 26 | Statistical    | <a href="#">#12c</a> | Explain how missing data were addressed                           | 5-6 |
| 27 | methods        |                      |                                                                   |     |
| 28 |                |                      |                                                                   |     |
| 29 |                |                      |                                                                   |     |
| 30 |                |                      |                                                                   |     |
| 31 | Statistical    | <a href="#">#12d</a> | If applicable, explain how loss to follow-up was addressed        | N/A |
| 32 | methods        |                      |                                                                   |     |
| 33 |                |                      |                                                                   |     |
| 34 |                |                      |                                                                   |     |
| 35 |                |                      |                                                                   |     |
| 36 | Statistical    | <a href="#">#12e</a> | Describe any sensitivity analyses                                 | 5-6 |
| 37 | methods        |                      |                                                                   |     |
| 38 |                |                      |                                                                   |     |
| 39 |                |                      |                                                                   |     |
| 40 |                |                      |                                                                   |     |
| 41 |                |                      |                                                                   |     |
| 42 | <b>Results</b> |                      |                                                                   |     |
| 43 |                |                      |                                                                   |     |
| 44 |                |                      |                                                                   |     |
| 45 | Participants   | <a href="#">#13a</a> | Report numbers of individuals at each stage of study—eg           | 6   |
| 46 |                |                      | numbers potentially eligible, examined for eligibility, confirmed |     |
| 47 |                |                      | eligible, included in the study, completing follow-up, and        |     |
| 48 |                |                      | analysed. Give information separately for for exposed and         |     |
| 49 |                |                      | unexposed groups if applicable.                                   |     |
| 50 |                |                      |                                                                   |     |
| 51 |                |                      |                                                                   |     |
| 52 |                |                      |                                                                   |     |
| 53 |                |                      |                                                                   |     |
| 54 |                |                      |                                                                   |     |
| 55 |                |                      |                                                                   |     |
| 56 |                |                      |                                                                   |     |
| 57 | Participants   | <a href="#">#13b</a> | Give reasons for non-participation at each stage                  | 6   |
| 58 |                |                      |                                                                   |     |
| 59 |                |                      |                                                                   |     |
| 60 |                |                      |                                                                   |     |

|    |                   |                      |                                                                   |         |
|----|-------------------|----------------------|-------------------------------------------------------------------|---------|
| 1  | Participants      | <a href="#">#13c</a> | Consider use of a flow diagram                                    | N/A     |
| 2  |                   |                      |                                                                   |         |
| 3  |                   |                      |                                                                   |         |
| 4  | Descriptive data  | <a href="#">#14a</a> | Give characteristics of study participants (eg demographic,       | 6-7     |
| 5  |                   |                      | clinical, social) and information on exposures and potential      |         |
| 6  |                   |                      | confounders. Give information separately for exposed and          |         |
| 7  |                   |                      | unexposed groups if applicable.                                   |         |
| 8  |                   |                      |                                                                   |         |
| 9  |                   |                      |                                                                   |         |
| 10 |                   |                      |                                                                   |         |
| 11 |                   |                      |                                                                   |         |
| 12 |                   |                      |                                                                   |         |
| 13 |                   |                      |                                                                   |         |
| 14 | Descriptive data  | <a href="#">#14b</a> | Indicate number of participants with missing data for each        | 6-7     |
| 15 |                   |                      | variable of interest                                              |         |
| 16 |                   |                      |                                                                   |         |
| 17 |                   |                      |                                                                   |         |
| 18 |                   |                      |                                                                   |         |
| 19 | Descriptive data  | <a href="#">#14c</a> | Summarise follow-up time (eg, average and total amount)           | N/A     |
| 20 |                   |                      |                                                                   |         |
| 21 |                   |                      |                                                                   |         |
| 22 |                   |                      |                                                                   |         |
| 23 | Outcome data      | <a href="#">#15</a>  | Report numbers of outcome events or summary measures              | 7       |
| 24 |                   |                      | over time. Give information separately for exposed and            |         |
| 25 |                   |                      | unexposed groups if applicable.                                   |         |
| 26 |                   |                      |                                                                   |         |
| 27 |                   |                      |                                                                   |         |
| 28 |                   |                      |                                                                   |         |
| 29 |                   |                      |                                                                   |         |
| 30 | Main results      | <a href="#">#16a</a> | Give unadjusted estimates and, if applicable, confounder-         | 7-8     |
| 31 |                   |                      | adjusted estimates and their precision (eg, 95% confidence        |         |
| 32 |                   |                      | interval). Make clear which confounders were adjusted for and     |         |
| 33 |                   |                      | why they were included                                            |         |
| 34 |                   |                      |                                                                   |         |
| 35 |                   |                      |                                                                   |         |
| 36 |                   |                      |                                                                   |         |
| 37 |                   |                      |                                                                   |         |
| 38 |                   |                      |                                                                   |         |
| 39 |                   |                      |                                                                   |         |
| 40 | Main results      | <a href="#">#16b</a> | Report category boundaries when continuous variables were         | 7-8,    |
| 41 |                   |                      | categorized                                                       | Table 1 |
| 42 |                   |                      |                                                                   |         |
| 43 |                   |                      |                                                                   |         |
| 44 |                   |                      |                                                                   |         |
| 45 | Main results      | <a href="#">#16c</a> | If relevant, consider translating estimates of relative risk into | 7-8     |
| 46 |                   |                      | absolute risk for a meaningful time period                        |         |
| 47 |                   |                      |                                                                   |         |
| 48 |                   |                      |                                                                   |         |
| 49 |                   |                      |                                                                   |         |
| 50 |                   |                      |                                                                   |         |
| 51 | Other analyses    | <a href="#">#17</a>  | Report other analyses done—e.g., analyses of subgroups and        | 8       |
| 52 |                   |                      | interactions, and sensitivity analyses                            |         |
| 53 |                   |                      |                                                                   |         |
| 54 |                   |                      |                                                                   |         |
| 55 |                   |                      |                                                                   |         |
| 56 | <b>Discussion</b> |                      |                                                                   |         |
| 57 |                   |                      |                                                                   |         |
| 58 |                   |                      |                                                                   |         |
| 59 |                   |                      |                                                                   |         |
| 60 |                   |                      |                                                                   |         |



|    |                          |                     |                                                                      |       |
|----|--------------------------|---------------------|----------------------------------------------------------------------|-------|
| 1  | Key results              | <a href="#">#18</a> | Summarise key results with reference to study objectives             | 8-9   |
| 2  |                          |                     |                                                                      |       |
| 3  |                          |                     |                                                                      |       |
| 4  | Limitations              | <a href="#">#19</a> | Discuss limitations of the study, taking into account sources of     | 11-12 |
| 5  |                          |                     | potential bias or imprecision. Discuss both direction and            |       |
| 6  |                          |                     | magnitude of any potential bias.                                     |       |
| 7  |                          |                     |                                                                      |       |
| 8  |                          |                     |                                                                      |       |
| 9  |                          |                     |                                                                      |       |
| 10 |                          |                     |                                                                      |       |
| 11 |                          |                     |                                                                      |       |
| 12 | Interpretation           | <a href="#">#20</a> | Give a cautious overall interpretation considering objectives,       | 10    |
| 13 |                          |                     | limitations, multiplicity of analyses, results from similar studies, |       |
| 14 |                          |                     | and other relevant evidence.                                         |       |
| 15 |                          |                     |                                                                      |       |
| 16 |                          |                     |                                                                      |       |
| 17 |                          |                     |                                                                      |       |
| 18 |                          |                     |                                                                      |       |
| 19 | Generalisability         | <a href="#">#21</a> | Discuss the generalisability (external validity) of the study        | 12    |
| 20 |                          |                     | results                                                              |       |
| 21 |                          |                     |                                                                      |       |
| 22 |                          |                     |                                                                      |       |
| 23 |                          |                     |                                                                      |       |
| 24 |                          |                     |                                                                      |       |
| 25 | <b>Other Information</b> |                     |                                                                      |       |
| 26 |                          |                     |                                                                      |       |
| 27 |                          |                     |                                                                      |       |
| 28 | Funding                  | <a href="#">#22</a> | Give the source of funding and the role of the funders for the       | 13    |
| 29 |                          |                     | present study and, if applicable, for the original study on which    |       |
| 30 |                          |                     | the present article is based                                         |       |
| 31 |                          |                     |                                                                      |       |
| 32 |                          |                     |                                                                      |       |
| 33 |                          |                     |                                                                      |       |
| 34 |                          |                     |                                                                      |       |
| 35 |                          |                     |                                                                      |       |

The STROBE checklist is distributed under the terms of the Creative Commons Attribution License CC-BY. This checklist was completed on 23. May 2019 using <https://www.goodreports.org/>, a tool made by the [EQUATOR Network](#) in collaboration with [Penelope.ai](#)

# BMJ Open

## A retrospective cohort study of the relationship between systolic blood pressure variability and multiple sclerosis disability

|                                 |                                                                                                                                                                                                                                                     |
|---------------------------------|-----------------------------------------------------------------------------------------------------------------------------------------------------------------------------------------------------------------------------------------------------|
| Journal:                        | <i>BMJ Open</i>                                                                                                                                                                                                                                     |
| Manuscript ID                   | bmjopen-2019-034355.R1                                                                                                                                                                                                                              |
| Article Type:                   | Original research                                                                                                                                                                                                                                   |
| Date Submitted by the Author:   | 17-Dec-2019                                                                                                                                                                                                                                         |
| Complete List of Authors:       | Goldman, Myla; Virginia Commonwealth University, Neurology<br>Min, Seulgi; University of Virginia<br>Mason Lobo, Jennifer ; University of Virginia, Public Health Sciences<br>Sohn, Min-Woong; University of Kentucky, Health Management and Policy |
| <b>Primary Subject Heading</b>: | Neurology                                                                                                                                                                                                                                           |
| Secondary Subject Heading:      | Cardiovascular medicine                                                                                                                                                                                                                             |
| Keywords:                       | Multiple sclerosis < NEUROLOGY, disability progression, blood pressure variability, cardiovascular comorbidities                                                                                                                                    |
|                                 |                                                                                                                                                                                                                                                     |

SCHOLARONE™  
Manuscripts



I, the Submitting Author has the right to grant and does grant on behalf of all authors of the Work (as defined in the below author licence), an exclusive licence and/or a non-exclusive licence for contributions from authors who are: i) UK Crown employees; ii) where BMJ has agreed a CC-BY licence shall apply, and/or iii) in accordance with the terms applicable for US Federal Government officers or employees acting as part of their official duties; on a worldwide, perpetual, irrevocable, royalty-free basis to BMJ Publishing Group Ltd ("BMJ") its licensees and where the relevant Journal is co-owned by BMJ to the co-owners of the Journal, to publish the Work in this journal and any other BMJ products and to exploit all rights, as set out in our [licence](#).

The Submitting Author accepts and understands that any supply made under these terms is made by BMJ to the Submitting Author unless you are acting as an employee on behalf of your employer or a postgraduate student of an affiliated institution which is paying any applicable article publishing charge ("APC") for Open Access articles. Where the Submitting Author wishes to make the Work available on an Open Access basis (and intends to pay the relevant APC), the terms of reuse of such Open Access shall be governed by a Creative Commons licence – details of these licences and which [Creative Commons](#) licence will apply to this Work are set out in our licence referred to above.

Other than as permitted in any relevant BMJ Author's Self Archiving Policies, I confirm this Work has not been accepted for publication elsewhere, is not being considered for publication elsewhere and does not duplicate material already published. I confirm all authors consent to publication of this Work and authorise the granting of this licence.

1  
2  
3  
4  
5  
6  
7  
8  
9 **A retrospective cohort study of the relationship between systolic blood pressure variability and**  
10 **multiple sclerosis disability**  
11

12  
13 Running title: Blood pressure variability and MS disability  
14  
15

16  
17  
18  
19  
20  
21  
22 Myla D. Goldman, MD, MSc;<sup>1</sup> Seulgi Min, BA;<sup>2</sup> Jennifer M. Lobo, Ph.D.;<sup>3</sup> Min-Woong Sohn,  
23 Ph.D.<sup>4</sup>  
24  
25

26  
27 <sup>1</sup> Department of Neurology, Virginia Commonwealth University, Richmond, Virginia

28 <sup>2</sup> College of Arts and Sciences, University of Virginia, Charlottesville, Virginia

29 <sup>3</sup> Department of Public Health Sciences, University of Virginia, Charlottesville, Virginia

30 <sup>4</sup> Department of Health Management and Policy, University of Kentucky College of Public  
31 Health, Lexington, Kentucky  
32  
33

34  
35 Corresponding Author:

36 Myla D. Goldman, MD, MSc  
37 Virginia Commonwealth University  
38 Department of Neurology  
39 1101 E. Marshall Street  
40 PO Box 980599  
41 **Phone:** (804) 828-9869  
42 **Fax:** (804) 827-1230  
43 **Email:** myla.goldman@vcuhealth.org  
44  
45  
46

47 Word count of Abstract: 268

48 Word count of Paper: 2851  
49  
50  
51  
52  
53  
54  
55  
56  
57  
58  
59  
60

## ABSTRACT

**Objective:** To examine the relationship between visit-to-visit systolic blood pressure (SBP) variability and patient-reported outcome measure of disability in multiple sclerosis (MS) patients.

**Design:** A retrospective cohort study of individuals with MS who completed a Patient Determined Disease Steps (PDDS) scale between 2011 – 2015 at a multiple sclerosis specialty clinic.

**Participants:** Individuals with MS for whom both a completed PDDS scale and  $\geq 3$  SBP measures within the prior 12 months of the survey were available.

**Main Outcome Measure:** Participants were grouped into three classes of disability (No or Mild (PDDS 0 - 1), Moderate (2 - 3), Severe (4 - 7)). SBP variability was calculated as within-subject standard deviations using all SBP measures taken during the past 12 months. SBP variability was analyzed by Tertile groups.

**Results:** Ninety-two subjects were included in this analysis. Mean PDDS score was  $2.22 \pm 1.89$ . Compared to subjects in Tertile 1 (lowest variability), the odds of being in a higher disability group was 3.5 times higher (OR = 3.48; 95% CI, 1.08 – 11.25;  $p = 0.037$ ) in Tertile 2 and 5.2 times higher (OR = 5.19; 95% CI, 1.53 – 17.61;  $p = 0.008$ ) in Tertile 3 (highest variability), independent of mean SBP, age, sex, race/ethnicity, BMI, and comorbidities ( $p$  for trend = 0.008). Mean PDDS scores were  $1.52 \pm 1.18$  in Tertile 1,  $2.73 \pm 1.02$  in Tertile 2 and  $2.42 \pm 0.89$  in Tertile 3 after adjusting for the same covariates.

**Conclusions:** Our results show a significant gradient relationship between SBP variability and MS-related disability. More research is needed to determine the underlying pathophysiological relationship between SBP variability and MS disability progression.

1  
2  
3 Keywords: multiple sclerosis, disability progression, blood pressure variability, cardiovascular  
4  
5 comorbidities  
6  
7  
8  
9  
10  
11  
12  
13  
14  
15  
16  
17  
18  
19  
20  
21  
22  
23  
24  
25  
26  
27  
28  
29  
30  
31  
32  
33  
34  
35  
36  
37  
38  
39  
40  
41  
42  
43  
44  
45  
46  
47  
48  
49  
50  
51  
52  
53  
54  
55  
56  
57  
58  
59  
60

## Article Summary

### Strengths and Limitations of This Study

- This is a first study to look at the relationship between the systolic blood pressure (SBP) variability and MS-related disability outcomes.
- This study paired prospectively collected patient-reported outcomes with retrospectively collected data, which allowed us to leverage existing data to take a first look at this novel question.
- Our analysis included a multi-faceted approach including - patient-reported measures, clinical outcomes (blood pressure), and concurrent co-morbid diagnosis.
- The retrospective collection of the paired clinical data limited the standardization of the number and inter-interval timing of blood pressure measurements, as well as the total number of subjects available for analysis.

### 1. Introduction

Multiple Sclerosis (MS) is an inflammatory and degenerative disorder of the central nervous system. Individuals with MS commonly experience some degree of disability progression independent of inflammatory driven events. The underlying mechanisms driving this inflammatory-independent disease progression remains poorly understood. It is likely that there is no single factor that drives MS progression. Instead it is believed to be a multi-faceted process with variable importance and influence of factors for any individual person. Posited factors include medical co-morbidities, as well as environmental factors such as smoking or vitamin D exposure.

1  
2  
3 Co-morbid cardiovascular disease (CVD) is more prevalent in MS relative to healthy  
4 populations. In MS patients, CVD is associated with worsened disease progression and reduced  
5 quality of life, although the mechanism remains uncertain.<sup>1-5</sup> Visit-to-visit systolic blood  
6 pressure (SBP) variability is an emerging risk factor for a wide array of health outcomes  
7 including CVD, kidney failure, cognitive dysfunction, diabetic complications, and all-cause  
8 mortality.<sup>6-10</sup> Excessive SBP variability ( $\geq 10$  within-subject standard deviation) has been  
9 associated with many of these outcomes independent of mean blood pressure and  
10 hypertension.<sup>8,11,12</sup> Evidence suggests that visit-to-visit blood pressure variability may have  
11 stronger effects on cardiovascular outcomes than that of measures taken during a single visit or  
12 by 24-hour ambulatory monitoring devices.<sup>13-15</sup> While various vascular comorbidities have been  
13 previously studied in the progression of MS, the relationship between SBP variability and MS  
14 progression has yet to be explored.

15  
16  
17  
18  
19  
20  
21  
22  
23  
24  
25  
26  
27  
28  
29  
30  
31 We conducted a retrospective cohort study to examine the relationship between SBP  
32 variability and self-reported MS disability. We hypothesized that higher SBP variability is  
33 associated with greater degree of disability among individuals with MS.

## 34 35 36 37 38 39 **2. Material and Methods**

### 40 41 42 **Study Design and Sample**

43  
44  
45 We conducted a retrospective cohort study of individuals with MS who participated in  
46 research between 2011 and 2015 at the University of Virginia School of Medicine (UVA) and  
47 had previously prospectively completed the Patient Determined Disease Steps (PDDS) scale, a  
48 validated patient-reported outcome measure of MS disability.<sup>16-18</sup> The PDDS is a self-report tool  
49 of MS disability in which participants indicate their level of disability between 0 ('normal') and  
50  
51  
52  
53  
54  
55  
56  
57  
58  
59  
60



1  
2  
3 8 ('bedridden'), where 4 indicates "early cane" use. SBP measurements were obtained from  
4  
5 medical records and only those subjects with  $\geq 3$  available SBP measurements captured within  
6  
7 the 12 months prior to PDDS completion were included in the analysis. This study was approved  
8  
9 by the UVA institutional review board.  
10

### 11 12 13 **Visit-to-visit variability of systolic blood pressure**

14  
15  
16 All available SBP measures within 12-months pre- and post-PDDS survey data were extracted  
17  
18 from the electronic medical records system. Within-subject means and standard deviations of  
19  
20 SBP were computed. Coefficient of variation was calculated by dividing the standard deviation  
21  
22 by the mean to obtain a measure of variability that was more independent of the mean than  
23  
24 standard deviation. We used the within-subject coefficients of variation to divide the study sample into  
25  
26 three equal-sized groups (tertiles), whose SBPCV ranges are 0.012 - 0.064 for Tertile 1 (the lowest  
27  
28 variability group), 0.065 – 0.087 for Tertile 2, and 0.089 – 0.172 for Tertile 3 (the highest variability  
29  
30 group).  
31  
32

### 33 34 35 **Covariates**

36  
37 Demographic data (age, sex, and race/ethnicity) were collected. We searched with  
38  
39 Clinical Data Repository (CDR), a data warehouse containing clinical information from patients  
40  
41 treated at the University of Virginia, for the 12-month period prior to the PDDS survey to  
42  
43 identify co-existing conditions including cardiovascular disease (ICD-9-CM codes, 410.xx –  
44  
45 414.xx, 428.xx, 431.xx, 434.xx, and 436.xx), peripheral vascular disease (443.9), diabetes  
46  
47 (250.xx, 357.2, 362.01), depression (311.xx, 300.4, 296.20, 296.80, 296.89, 296.90), and  
48  
49 hypertension (401.x). In addition to the diagnostic codes, we classified hypertension in patients  
50  
51 using the 140/90 mm Hg per ACC/AHA guideline.<sup>19</sup> We also extracted body mass index (BMI)  
52  
53 data within six months of the PDDS survey completion date.  
54  
55  
56  
57  
58  
59  
60

## Statistical Analysis

We used multiple regression analysis to examine the relationship between SBP variability and the PDDS disability rating. To best utilize the ordinal nature of our response variable (PDDS score)<sup>16,17</sup>, we estimated an ordinal logistic regression<sup>20</sup> and found that it did not satisfy the proportional odds assumption.<sup>20,21</sup> We tried several medically meaningful groupings to satisfy the assumption and decided on three groups based on the PDDS scores as follows: No or Mild Disability (PDDS scores 0 or 1), Moderate Disability (PDDS scores 2 or 3), and Severe Disability (PDDS scores 4 or higher). The disability outcomes in these new groups were modeled using ordinal logistic regression as a function of SBP variability, adjusting for patient demographic data (age, sex, and race/ethnicity), mean SBP, BMI, hypertension, and depression.

As a sensitivity analysis, we estimated two additional models. First, we defined the PDDS score 3 or above as presence of severe disability and modeled the binary response (0 = No or Mild Disability; 1 = Moderate to Severe Disability) using a logistic regression (Table e-1). Second, we treated the PDDS score as a continuous variable and estimated a linear regression that are identically specified as the ordinal logistic regression model (Table e-2). Because SBP variability is found to be correlated with the number of measures used in computing the within-subject standard deviations, we controlled for the number of BP measures in another sensitivity analysis (Table e-3).

Finally, we tested whether PDDS scores can predict SBP variability before the study (Table e-4) and whether PDDS scores can predict SBP variability after the survey (Table e-5) by estimating linear regressions to predict pre- and post-survey SBP variability as a function of PDDS scores, adjusting for age, sex, race, and other covariates.

We used Stata SE v. 15.1 (StataCorp, College Station, TX) for all statistical analysis.

### Patient and Public Involvement

No patient involved.

### 3. Results

A total of 218 PDDS surveys were identified from available study data. Among these, 17 subjects had completed more than one PDDS survey; in such cases, the first available survey date with corresponding  $\geq 3$  SBP measures was utilized. No subject contributed more than once to the final data set. When the same respondent participated in the PDDS survey more than once, we used the first survey. Of the resultant subjects, only 94 had the requisite  $\geq 3$  blood pressure measures in the 12-months prior to the survey completion date. Two additional subjects were excluded due to lack of available records to permit BMI calculation (absent height and/or weight).

The resultant 92 subjects included in the final analysis had a mean age of  $44.7 \pm 12.2$  years at the time of PDDS survey completion. They were predominantly white (82.6%) and 54% female. Their mean SBP was  $124.1 \pm 13.2$  mm Hg overall and were highest in Tertile 1 ( $128.0 \pm 13.0$  mm Hg) and lowest in Tertile 2 ( $125.8 \pm 13.0$  mm Hg). Their within-subject SBP standard deviation was  $9.9 \pm 4.6$  mm Hg overall but changed from  $5.8 \pm 2.1$  mm Hg (interquartile range [IQR] 4.4 – 7.4 mm Hg) to  $9.2 \pm 1.4$  mm Hg (IQR 11.7 – 17.7 mm Hg) in Tertile 2, and  $14.8 \pm 3.9$  (IQR 8.5 – 10.2 mm Hg) in Tertile 3. Their mean BMI was  $29.0$  kg/m<sup>2</sup>. A total of 19

1  
2  
3 (20.7%) had depression, 28 (30.4%) had hypertension (11 patients with a diagnosis in ICD-9-CM  
4 and 17 patients with elevated mean BP). We could not identify any subject with vascular  
5  
6  
7  
8 comorbidities except for one who had acute myocardial infarction and was in Tertile 2. For this  
9  
10 reason, vascular comorbidities have not been used in any subsequent analyses. The mean and  
11  
12 median PDDS score was  $2.2 \pm 1.89$  and 2 (IQR 0 – 4). Forty patients (43.5%) had no or mild  
13  
14 disability, 27 (29.4%) had moderate disability, and 25 (27.2%) had severe disability (Table 1).

15  
16  
17 Participants included in the analysis were not significantly different from those excluded  
18  
19 (n = 126) in terms of PDDS score, patient sex, race and body mass index (Table 2). However,  
20  
21 included subjects were older (48.7 vs 44.7 years; p = 0.016), less hypertensive (30.4% vs 52.4%;  
22  
23 p = 0.001) and more depressed (20.7% vs 5.6%; p < 0.001).

24  
25  
26 Results from multiple regression analyses are shown in Table 3. Compared to subjects in  
27  
28 Tertile 1 (lowest variability), the odds of being in a higher disability group was 3.5 times higher  
29  
30 (OR = 3.48; 95% CI, 1.08 – 11.25; p = 0.037) in Tertile 2 and 5.2 times higher (OR = 5.19; 95%  
31  
32 CI, 1.53 – 17.61; p = 0.008) in Tertile 3 (highest variability), independent of mean SBP, age, sex,  
33  
34 race/ethnicity, BMI, hypertension and depression (p for trend = 0.008). Mean PDDS scores were  
35  
36  $1.52 \pm 1.18$  in Tertile 1,  $2.73 \pm 1.02$  in Tertile 2 and  $2.42 \pm 0.89$  in Tertile 3 after adjusting for the  
37  
38 same covariates as the model shown in Table 3.

39  
40  
41  
42 For sensitivity analyses, we checked the robustness of this association by estimating a  
43  
44 logistic regression that predicted the binary indicator of PDDS score 3 or above (moderate or  
45  
46 severe disability) and a linear regression that predicted the original PDDS score as a continuous  
47  
48 variable (Tables e-1 and e-2). All sensitivity analyses showed that the significant gradient  
49  
50 relationship between SBP variability and disability ratings assessed by PPDS scale persisted.  
51  
52  
53  
54  
55  
56  
57  
58  
59  
60

1  
2  
3 We checked whether the number of SBP measures used to compute the variability is a  
4 confounding factor between the variability and the PDDS outcome by estimating the model  
5 shown in Table 2 with the number of measures as an additional covariate (Table e-3). The  
6 significant gradient relationship persisted in this model as well ( $p$  for trend = 0.007).  
7  
8  
9

10  
11  
12 Finally, we tested the potential multi-directionality of the relationship between PDDS  
13 scores and SBP variability by predicting the SBP variability before and after the study using  
14 PDDS scores. From the 92 included subjects, 89 subjects had available  $\geq 3$  post-survey SBP  
15 measures, for whom the pre- and post-survey SBP coefficients of variation were correlated at  $r =$   
16 0.10 ( $p = 0.349$ ), while SBP means were correlated at  $r = 0.83$  ( $p < 0.001$ ). We estimated two  
17 regression models that predict pre-survey and post-survey SBP coefficient of variation using  
18 PDDS scores, after controlling for age, sex, and race. PDDS scores did not predict pre-survey  
19 variability in any model specification (Table e-4). On the other hand, those with moderate  
20 disability had 0.03 higher post-survey coefficient of variation in SBP (95% CI, 0.01 – 0.05;  $p =$   
21 0.003) compared to those with no or mild disability but the severe disability group did not have  
22 significantly different SBP variability from the no or mild group. Mean SBP, number of BP  
23 measures, or any other comorbidities did not change this association (Table e-5). These tests of  
24 directionality of the association between SBP variability and PDDS scores are summarized in  
25 Figure 1.  
26  
27  
28  
29  
30  
31  
32  
33  
34  
35  
36  
37  
38  
39  
40  
41  
42  
43

#### 44 **4. Discussion**

45  
46  
47 Our results demonstrate a significant and strong graded relationship between SBP  
48 variability and self-reported disability outcome measures (PDDS) among MS patients. Patients in  
49 Tertile 3 (highest variability) had an approximately six times higher risk of being in the higher  
50 disability group compared to those in Tertile 1 (lowest variability). This relationship was  
51  
52  
53  
54  
55  
56  
57  
58  
59  
60

1  
2  
3 independent of mean SBP, BMI, hypertension, depression, and patient demographic factors. This  
4  
5 result was robust to different analytic methods such as logistic regression to predict PDDS score  
6  
7 3 or higher (presence of moderate to severe disability) and ordinary least squares regression that  
8  
9 predicted the PDDS score as a continuous outcome.  
10  
11

12  
13 Another important finding in this study is that the association of excessive SBP  
14  
15 variability with higher PDDS scores can occur in normotensive individuals. Indeed, overall, 70%  
16  
17 of our cohort were normotensive (< 140/90 mm Hg) or without hypertension diagnosis. They  
18  
19 also had lower rates of hypertension in higher SBP variability tertiles with the lowest proportion  
20  
21 observed in Tertile 3 (19% vs 41% in Tertile 1), a group with the highest SBP variability. This  
22  
23 finding is consistent with previous studies by Sohn and his colleagues on diabetic  
24  
25 complications.<sup>8,11,12</sup> Our results also demonstrate that mean SBP was not significantly associated  
26  
27 with PDDS groups, suggesting there may be a different physiologic mechanism at play, not  
28  
29 simply elevated blood pressures.<sup>13</sup>  
30  
31  
32  
33

34  
35 Excessive visit-to-visit SBP variability has been associated with cardiovascular and  
36  
37 several other health outcomes. To our knowledge, this is the first study to show that excessive  
38  
39 visit-to-visit SBP variability may be a risk factor to MS disability progression. Previously,  
40  
41 several large studies have identified a relationship between vascular comorbidities and MS  
42  
43 outcomes, both clinical and patient-reported, using diagnostic codes (e.g., hypertension) or  
44  
45 medications (anti-hypertensives) to classify patients.<sup>1-4</sup> Our results confirm the previous  
46  
47 diagnosis-based research and extends that work, by identifying excessive SBP variability as a  
48  
49 contributing factor to the previously identified relationship between blood-pressure changes and  
50  
51 MS. Our results further suggest that a relevant hemodynamic mechanism in the interplay  
52  
53  
54  
55  
56  
57  
58  
59  
60

1  
2  
3 between cardiovascular disease and MS disability progression, is not simply hypertension (i.e.,  
4 elevated mean BP), but also excessive SBP variability.  
5  
6  
7

8 Pathophysiological mechanisms involved in the relationship between blood pressure  
9 variability and health outcomes are currently explained by arterial stiffness, endothelial  
10 dysfunction, and subclinical inflammation.<sup>22-25</sup> Several factors known to increase blood pressure  
11 variability include autonomic dysfunction<sup>26</sup>, low hydration status<sup>27</sup>, insulin dysregulation<sup>28,29</sup> and  
12 sleep-apnea<sup>30</sup> are commonly found in patients with MS. Tettey et al. suggests that vascular  
13 comorbidities may activate the inflammatory cascade that ultimately leads to neurodegeneration  
14 which manifests in disability progression in MS.<sup>2</sup> They also suggested that cerebral endothelial  
15 dysfunction may be involved in “trans-endothelial migration of T-lymphocytes and monocytes to  
16 the CNS with destructive and often neurodegenerative consequences.”<sup>2</sup> Our results suggest that  
17 excessive SBP variability could be a relevant factor in that postulated inflammatory cascade in  
18 the vasculature and that may contribute to the cerebral endothelial dysfunction, which combine  
19 to produce the MS disability progression we observed in our study. More research is needed to  
20 test whether excessive SBP variability is indeed implicated in these pathways.  
21  
22  
23  
24  
25  
26  
27  
28  
29  
30  
31  
32  
33  
34  
35  
36  
37

38 It is still premature to derive any MS-related clinical implications from our results. But it  
39 is advisable that MS patients be checked for SBP variability and those with excessive variability  
40 (e.g., within-subject standard deviation of 8 or higher) be recommended for careful vascular  
41 evaluation. Interestingly, we found that the majority of patients we identified as having  
42 hypertension according to the JNC7<sup>31</sup> and 2017 ACC/AHA criteria<sup>19</sup> did not have an actual  
43 diagnosis of hypertension. This suggests a potential under-diagnosis of hypertension, at least in  
44 our cohort.  
45  
46  
47  
48  
49  
50  
51  
52  
53  
54  
55  
56  
57  
58  
59  
60

1  
2  
3 This cross-sectional study was not designed to make any causal inferences between SBP  
4 variability and PDDS scores. However, our sensitivity analyses suggest that, while SBP  
5 variability was a strong and significant predictor of PDDS scores, the latter did not predict the  
6 former. Our data further suggest that the PDDS scores could significantly predict post-survey  
7 SBP variability but that the pre- and post-survey SBP variabilities were not correlated ( $r = 0.10$ ;  
8  $p = 0.349$ ). This lends credence to the notion that SBP variability can in fact be a prognostic  
9 factor for future disability progression and that there may be a vicious cycle of increasing SBP  
10 variability and worsening disability feeding each other dynamically over time.  
11  
12  
13  
14  
15  
16  
17  
18  
19  
20  
21

22 There are limitations to our work. This is a retrospective study in design and we relied on  
23 the CDR for our health system as a source of blood pressure measures and comorbid conditions.  
24 Accuracy of these values is not known. Second, we were limited in sample size, mainly because  
25 the majority of patients in the original study sample were excluded because they lacked the  
26 requisite number of SBP measures. A bivariate comparison of the included vs excluded patients  
27 in Table 2 showed that they are similar in demographic factors, with the noted exception of age  
28 and depression, both of which were higher in the included population. These factors may have  
29 resulted in higher visit frequency leading to more available SBP values in those meeting  
30 eligibility criteria. Interestingly, the included population had lower incidence of hypertension  
31 compared to excluded subjects, as identified by ICD-9-CM codes or BP measures taken during  
32 the one-year period prior to the survey completion. We were only able to capture BP measures  
33 documented in our institutional electronic-medical records and there may have been additional  
34 values measured by other providers that were not captured in our data. We were not able to  
35 control for some potential confounders, including MS disease duration, disease modifying  
36 treatments, and some comorbid conditions that might have affected disability outcomes in our  
37  
38  
39  
40  
41  
42  
43  
44  
45  
46  
47  
48  
49  
50  
51  
52  
53  
54  
55  
56  
57  
58  
59  
60



1  
2  
3 data. In addition, while validated, PDDS is a patient-reported outcome that may have unknown  
4  
5 response bias. Despite these limitations, we believe our results represent an important first step in  
6  
7 studying this relationship.  
8  
9

10  
11 In conclusion, our results show that excessive SBP variability is associated with  
12  
13 increased disability in MS patients, independent of mean SBP, hypertension diagnosis,  
14  
15 depression, and obesity. This may represent a novel mechanism which may mediate the  
16  
17 relationship between vascular dysfunction and progression of MS disability. Further prospective  
18  
19 studies are needed to confirm whether excessive SBP variability is linked to the subclinical  
20  
21 inflammation markers and/or cerebral endothelial dysfunction, and other markers of disease  
22  
23 progression.  
24  
25  
26  
27  
28  
29  
30  
31  
32  
33  
34  
35  
36  
37  
38  
39  
40  
41  
42  
43  
44  
45  
46  
47  
48  
49  
50  
51  
52  
53  
54  
55  
56  
57  
58  
59  
60

### **Declaration of Conflicting Interests**

Myla D. Goldman has served as a consultant for ADAMAS, Celgene, EMD Serono, Novartis Pharmaceuticals, Sanofi Genzyme, Teva Pharmaceuticals. She has received research funding from Biogen Idec, Novartis Pharmaceuticals, National MS Society, MedDay Pharmaceuticals, and PCORI.

Seulgi Min reports no disclosures.

Jennifer M. Lobo reports no disclosures.

Min-Woong Sohn reports no disclosures.

### **Funding**

This research did not receive any specific grant from funding agencies in the public, commercial, or not-for-profit sectors. This work was supported by philanthropic funds provided by the ziMS Foundation.

### **Data Availability Statement**

Anonymized data not published within this article are available from the corresponding author (MDG) on reasonable request.

### **Author Statement**

Myla D. Goldman, MD, MSc - Study concept and design, acquisition of data, analysis and interpretation of data, and drafting/revising the manuscript

Seulgi Min, BA - Acquisition of data, drafting/revising the manuscript

Jennifer M. Lobo, PhD - Diagram creation, drafting/revising the manuscript

Min-Woong Sohn, PhD - Study concept and design, analysis and interpretation of data, statistical analysis, and drafting/revising the manuscript

1  
2  
3 Figure 1. Summary of the significant relationships (solid arrows) and nonsignificant relationships  
4 (dashed arrows) between SBP variability and PDDS scores\*  
5  
6  
7

8 <<Figure 1 Here>>  
9  
10

11 \* Pre-survey SBP variability was significantly predictive of PDDS scores ( $p = 0.015$ ), and PDDS scores  
12 were predictive of post-survey PDDS variability ( $p = 0.011$ ). PDDS scores did not predict pre-survey SBP  
13 variability, and pre-survey SBP variability did not predict post-survey SBP variability. The p-values were  
14 obtained from a Wald test with 2 degrees of freedom (pre-survey variability to PDDS) and from an F test  
15 with 2 and 83 degrees of freedom (PDDS to post-survey variability).  
16  
17  
18  
19  
20  
21  
22  
23  
24  
25  
26  
27  
28  
29  
30  
31  
32  
33  
34  
35  
36  
37  
38  
39  
40  
41  
42  
43  
44  
45  
46  
47  
48  
49  
50  
51  
52  
53  
54  
55  
56  
57  
58  
59  
60

Table 1. Characteristics of Study Cohort (N = 92) \*

| Variable                                        | Tertiles of SBP coefficient of variation |                        |                |                         |         |
|-------------------------------------------------|------------------------------------------|------------------------|----------------|-------------------------|---------|
|                                                 | All                                      | 1 (Lowest Variability) | 2              | 3 (Highest Variability) | P-Value |
|                                                 | N (%)                                    | N (%)                  | N (%)          | N (%)                   |         |
| All, n (Row %)                                  | 92 (100.00%)                             | 31 (33.70%)            | 30 (32.61%)    | 31 (33.70%)             |         |
| Age, mean (SD)                                  | 44.71 (12.16)                            | 45.03 (14.29)          | 45.93 (12.54)  | 43.19 (9.41)            | 0.673   |
| Female                                          | 50 (54.35%)                              | 18 (58.06%)            | 20 (66.67%)    | 12 (38.71%)             | 0.080   |
| White Race                                      | 76 (82.61%)                              | 29 (93.55%)            | 25 (83.33%)    | 22 (70.97%)             | 0.063   |
| Within-subject SBP                              |                                          |                        |                |                         |         |
| Mean (mm Hg), mean (SD)                         | 124.05 (13.19)                           | 128.01 (12.98)         | 118.16 (11.86) | 125.78 (13.00)          | 0.008   |
| Standard deviation (mm Hg), mean (SD)           | 9.94 (4.59)                              | 5.82 (2.05)            | 9.17 (1.41)    | 14.79 (3.91)            | < 0.001 |
| Maximum (mm Hg), mean (SD)                      | 137.95 (15.11)                           | 135.74 (13.70)         | 132.60 (12.37) | 145.32 (16.34)          | 0.002   |
| Minimum (mm Hg), mean (SD)                      | 110.68 (14.19)                           | 120.45 (13.11)         | 105.43 (11.24) | 106.00 (12.95)          | < 0.001 |
| Number of measures, mean (SD)                   | 7.93 (5.53)                              | 6.29 (3.97)            | 10.33 (6.18)   | 7.26 (5.57)             | 0.011   |
| Body mass index (kg/m <sup>2</sup> ), mean (SD) | 29.03 (6.02)                             | 28.73 (5.64)           | 28.04 (5.25)   | 30.28 (6.99)            | 0.330   |
| Depression                                      | 19 (20.65%)                              | 4 (12.90%)             | 11 (36.67%)    | 4 (12.90%)              | 0.031   |
| Hypertension                                    | 28 (30.43%)                              | 13 (41.94%)            | 9 (30.00%)     | 6 (19.35%)              | 0.154   |
| PDDS Score, mean (SD)                           | 2.22 (1.89)                              | 1.52 (1.95)            | 2.73 (1.70)    | 2.42 (1.86)             | 0.031   |
| PDDS Score, median (Interquartile Range)        | 2 (0 – 4)                                | 0 (0 – 3)              | 3 (1 – 4)      | 2 (1 – 4)               |         |
| PDDS Score (3 Groups)                           |                                          |                        |                |                         |         |
| No or Mild (0, 1)                               | 40 (43.48%)                              | 19 (61.29%)            | 9 (30.00%)     | 12 (38.71%)             | 0.163   |
| Moderate (2, 3)                                 | 27 (29.35%)                              | 6 (19.35%)             | 11 (36.67%)    | 10 (32.26%)             |         |
| Severe (4 or higher)                            | 25 (27.17%)                              | 6 (19.35%)             | 10 (33.33%)    | 9 (29.03%)              |         |

\* SBP = systolic blood pressure; SD = standard deviation; PDDS = patient determined disease steps. All percentages are either column percentages (Col %) or row percentages (Row %). P-values for continuous variables were computed using one-way ANOVA and those for categorical variables were based on Pearson chi-square tests.

Table 2. Comparison of the included and excluded patients in the original cohort\*

| Variables                           | All           | Excluded      | Included      | P-Value |
|-------------------------------------|---------------|---------------|---------------|---------|
|                                     | N (Col %)     | N (Row %)     | N (Row %)     |         |
| All                                 | 218 (100.00%) | 126 (57.80%)  | 92 (42.20%)   |         |
| Age, mean (SD)                      | 47.04 (12.24) | 44.71 (12.16) | 48.74 (12.06) | 0.016   |
| Female                              | 113 (51.83%)  | 63 (50.00%)   | 50 (54.35%)   | 0.526   |
| White Race                          | 181 (83.03%)  | 105 (83.33%)  | 76 (82.61%)   | 0.888   |
| BMI (kg/m <sup>2</sup> ), mean (SD) | 28.25 (6.19)  | 29.03 (6.02)  | 27.59 (6.29)  | 0.102   |
| Hypertension                        | 94 (43.12%)   | 66 (52.38%)   | 28 (30.43%)   | 0.001   |
| Depression                          | 26 (11.93%)   | 7 (5.56%)     | 19 (20.65%)   | < 0.001 |
| PDDS Score, mean (SD)               | 2.05 (1.81)   | 2.22 (1.89)   | 1.93 (1.75)   | 0.247   |
| PDDS Score (3 Groups)               |               |               |               |         |
| No or Mild (0, 1)                   | 95 (43.58%)   | 55 (43.65%)   | 40 (43.48%)   | 0.212   |
| Moderate (2, 3)                     | 75 (34.40%)   | 48 (38.10%)   | 27 (29.35%)   |         |
| Severe (4 or higher)                | 48 (22.02%)   | 23 (18.25%)   | 25 (27.17%)   |         |

\* SD = standard deviation; BMI = body mass index; PDDS = patient determined disease steps.

Table 3. Ordinal logistic regression results for MS patients in a higher disability group (N = 92)\*

| Variables                                                         | Estimate (95% CI)      | P-Value |
|-------------------------------------------------------------------|------------------------|---------|
| Tertiles of SBP coefficient of variation [1 (Lowest Variability)] |                        |         |
| 2                                                                 | 3.480 (1.077 - 11.251) | 0.037   |
| 3 (Highest Variability)                                           | 5.193 (1.531 - 17.616) | 0.008   |
| Age                                                               | 1.100 (1.051 - 1.150)  | < 0.001 |
| Female [Male]                                                     | 3.177 (1.249 - 8.078)  | 0.015   |
| White Race [Other Races/Ethnicity]                                | 1.495 (0.450 - 4.963)  | 0.512   |
| Within-subject mean SBP (mm Hg)                                   | 0.991 (0.952 - 1.031)  | 0.647   |
| Hypertension                                                      | 0.930 (0.356 - 2.430)  | 0.882   |
| Depression                                                        | 1.183 (0.426 - 3.289)  | 0.747   |
| Body mass index (kg/m <sup>2</sup> )                              | 1.057 (0.974 - 1.147)  | 0.186   |

\* Reference categories are in angle brackets. Disability groups were defined as No or Mild (PDDS scores 0 or 1), Moderate (2 or 3), and Severe (4 or higher).

1  
2  
3  
4  
5  
6  
7  
8  
9  
10  
11  
12  
13  
14  
15  
16  
17  
18  
19  
20  
21  
22  
23  
24  
25  
26  
27  
28  
29  
30  
31  
32  
33  
34  
35  
36  
37  
38  
39  
40  
41  
42  
43  
44  
45  
46  
47

For peer review only

## REFERENCES

1. Dagan A, Gringouz I, Kliens I, Segal G. Disability Progression in Multiple Sclerosis Is Affected by the Emergence of Comorbid Arterial Hypertension. *J Clin Neurol*. 2016;12(3):345-350.
2. Tettey P, Simpson S, Jr., Taylor BV, van der Mei IA. Vascular comorbidities in the onset and progression of multiple sclerosis. *Journal of the neurological sciences*. 2014;347(1-2):23-33.
3. Marrie R, Rudick R, Horwitz R, et al. Vascular comorbidity is associated with more rapid disability progression in multiple sclerosis. *Neurology*. 2010;13(74):1041-1047.
4. Conway D, Thompson N, Cohen J. Influence of hypertension, diabetes, hyperlipidemia, and obstructive lung disease on multiple sclerosis disease course *MSJ*. 2016;23:277-285.
5. Marrie R, Horwitz R, Cutter G, Tyry T. Cumulative impact of comorbidity on quality of life in MS. *Acta Neurologica Scandinavica*. 2012;125(3):180-186.
6. Hata J, Arima H, Rothwell PM, et al. Effects of visit-to-visit variability in systolic blood pressure on macrovascular and microvascular complications in patients with type 2 diabetes mellitus: the ADVANCE trial. *Circulation*. 2013;128(12):1325-1334.
7. Rothwell PM, Howard SC, Dolan E, et al. Prognostic significance of visit-to-visit variability, maximum systolic blood pressure, and episodic hypertension. *Lancet*. 2010;375(9718):895-905.
8. Sohn M, Epstein N, Huang E, et al. Visit-to-visit systolic blood pressure variability and microvascular complications among patients with diabetes. *Journal of Diabetes and Its Complications*. 2016;31(1):195-201.
9. Epstein NU, Lane KA, Farlow MR, et al. Cognitive dysfunction and greater visit-to-visit systolic blood pressure variability. *J Am Geriatr Soc*. 2013;61(12):2168-2173.
10. Okada H, Fukui M, Tanaka M, et al. Visit-to-Visit Blood Pressure Variability Is a Novel Risk Factor for the Development and Progression of Diabetic Nephropathy in Patients With Type 2 Diabetes. *Diabetes Care*. 2013;36(7):1908-1912.
11. Budiman-Mak E, Epstein N, Brennan M, et al. Systolic Blood Pressure Variability and Lower Extremity Amputation In a Non-Elderly Diabetic Population. *Diabetes Res Clin Pract*. 2016;144:75-82.
12. Brennan MB, Guihan M, Budiman-Mak E, et al. Increasing SBP variability is associated with an increased risk of developing incident diabetic foot ulcers. *J Hypertens*. 2018.
13. Rothwell PM. Limitations of the usual blood-pressure hypothesis and importance of variability, instability, and episodic hypertension. *Lancet*. 2010;375(9718):938-948.
14. Mancia G, Facchetti R, Parati G, Zanchetti A. Visit-to-visit blood pressure variability, carotid atherosclerosis, and cardiovascular events in the European Lacidipine Study on Atherosclerosis. *Circulation*. 2012;126(5):569-578.
15. Tao Y, Xu J, Song B, et al. Short-term blood pressure variability and long-term blood pressure variability: which one is a reliable predictor for recurrent stroke. *Journal of human hypertension*. 2017;31(9):568-573.
16. Hohol M, Orav E, Weiner H. Disease Steps in multiple sclerosis: A simple approach to evaluate disease progression. *Neurology*. 1995;45:251-255.
17. Hohol M, Orav E, Weiner H. Disease Steps in multiple sclerosis: a longitudinal study comparing disease steps and EDSS to evaluate disease progression. *Multiple Sclerosis*. 1999(5):349-354.
18. Marrie R, Goldman M. Validity of performance scales for disability assessment in multiple sclerosis. *Multiple Sclerosis*. 2007;13(9):1176-1182.
19. Whelton PK, Carey RM. The 2017 American College of Cardiology/American Heart Association Clinical Practice Guideline for High Blood Pressure in Adults. *JAMA Cardiol*. 2018;3(4):352-353.
20. Agresti A. *Categorical data analysis*. 3rd ed. Hoboken, NJ: Wiley; 2012.
21. Brant R. Assessing proportionality in the proportional odds model for ordinal logistic regression. *Biometrics*. 1990;46(4):1171-1178.



- 1  
2  
3 22. Muntner P, Whittle J, Lynch A, Colantonio L, et.al. Visit-to-Visit Variability of Blood Pressure  
4 and Coronary Heart Disease, Stroke, Heart Failure, and Mortality: A Cohort Study. *Annals of*  
5 *Internal Medicine*. 2015;163(5):329-338.
- 6 23. Shimbo D, Shea S, McClelland R, al. e. Associations of aortic distensibility and arterial elasticity  
7 with long-term visit-to-visit blood pressure variability: the Multi-Ethnic Study of Atherosclerosis  
8 (MESA). . *American journal of hypertension*. 2013;23:896–902.
- 9 24. Nagai M, Hoshide S, Ishikawa J, Shimada K, Kario K. Visit-to-visit blood pressure variations:  
10 new independent determinants for carotid artery measures in the elderly at high risk of  
11 cardiovascular disease. . *Journal of the American Society of Hypertension*. 2011;5(3):184–119.
- 12 25. Diaz K, Veerabhadrapa P, Kashem M, al. e. Relationship of visit-to-visit and ambulatory blood  
13 pressure variability to vascular function in African Americans. . *Hypertension research : official*  
14 *journal of the Japanese Society of Hypertension*. 2012;35(5):55-61.
- 15 26. Adamec I, Habek M. Autonomic dysfunction in multiple sclerosis. *clinical neurol neurosurg*.  
16 2013;115:s73-78.
- 17 27. Cincotta MC, Engelhard MM, Stankey M, Goldman MD. Fatigue and fluid hydration status in  
18 multiple sclerosis: A hypothesis. *Multiple Sclerosis Journal*. 2016;22(11):1438-1443.
- 19 28. Penesova A, Vlcek M, Imrich R, et al. Hyperinsulinemia in newly diagnosis patients with  
20 multiple sclerosis. *Metabolic Brain Disease*. 2015;4:895-901.
- 21 29. Goldman M, Koenig S, Yeamans R, Johnston K. A study of Insuling Resistance In Multiple  
22 Sclerosis Subjects and Healthy Controls. *American Academy of Neurology, Abstract P6171*.  
23 2014.
- 24 30. Brass Sea. Sleep disorders in patients with multiple sclerosis. *Sleep Medicine Reviews*.  
25 2010(14):121-129.
- 26 31. Chobanian AV, Bakris GL, Black HR, et al. Seventh report of the Joint National Committee on  
27 Prevention, Detection, Evaluation, and Treatment of High Blood Pressure. *Hypertension*.  
28 2003;42(6):1206-1252.
- 29  
30  
31  
32  
33  
34  
35  
36  
37  
38  
39  
40  
41  
42  
43  
44  
45  
46  
47  
48  
49  
50  
51  
52  
53  
54  
55  
56  
57  
58  
59  
60

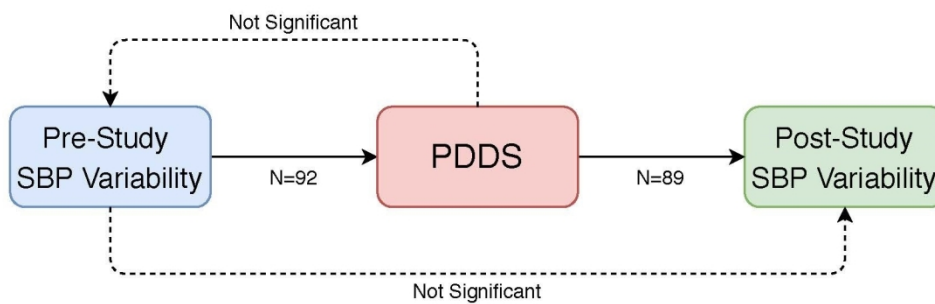

474x166mm (96 x 96 DPI)

Table e-1. Logistic regression results for patients having PDDS scores ≥3 (N = 92)\*

| Variable                                          | Model 1                |         | Model 2                |         | Model 3                |         |
|---------------------------------------------------|------------------------|---------|------------------------|---------|------------------------|---------|
|                                                   | OR (95% CI)            | P-Value | OR (95% CI)            | P-Value | OR (95% CI)            | P-Value |
| SBP variability tertiles [1 (Lowest Variability)] |                        |         |                        |         |                        |         |
| 2                                                 | 7.098 (1.745 - 28.862) | 0.006   | 7.767 (1.822 - 33.105) | 0.006   | 7.662 (1.783 - 32.928) | 0.006   |
| 3 (Highest Variability)                           | 4.564 (1.210 - 17.213) | 0.025   | 4.338 (1.124 - 16.749) | 0.033   | 4.273 (1.106 - 16.514) | 0.035   |
| Age                                               | 1.106 (1.047 - 1.168)  | < 0.001 | 1.107 (1.047 - 1.170)  | < 0.001 | 1.109 (1.048 - 1.174)  | < 0.001 |
| Female [ Male]                                    | 2.079 (0.718 - 6.020)  | 0.177   | 2.186 (0.741 - 6.444)  | 0.156   | 2.215 (0.751 - 6.536)  | 0.150   |
| White Race [Other race/ethnicity]                 | 1.972 (0.446 - 8.723)  | 0.371   | 1.867 (0.427 - 8.159)  | 0.407   | 1.984 (0.445 - 8.835)  | 0.369   |
| Within-subject mean SBP (mm Hg)                   | 1.003 (0.962 - 1.045)  | 0.901   | 1.002 (0.961 - 1.044)  | 0.929   | 0.994 (0.947 - 1.044)  | 0.818   |
| Hypertension                                      |                        |         | 0.637 (0.199 - 2.038)  | 0.447   | 0.605 (0.188 - 1.950)  | 0.400   |
| Depression                                        |                        |         | 0.632 (0.179 - 2.230)  | 0.476   | 0.617 (0.174 - 2.188)  | 0.454   |
| Body mass index (kg/m <sup>2</sup> )              |                        |         |                        |         | 1.032 (0.932 - 1.143)  | 0.542   |
| Pseudo R <sup>2</sup>                             | 0.265                  |         | 0.273                  |         | 0.276                  |         |
| Hosmer-Lemeshow Test (df), p-value                | 2.691 (8); p = 0.9522  |         | 7.885 (8); p = 0.4448  |         | 6.6506 (8); p = 0.5748 |         |
| Area under the ROC Curve                          | 0.823                  |         | 0.826                  |         | 0.831                  |         |
| AIC                                               | 107.184                |         | 110.186                |         | 111.814                |         |
| BIC                                               | 124.836                |         | 132.883                |         | 137.032                |         |

\* Reference categories are in angle brackets. P-values were NOT corrected for multiple comparison. PDDS scores ≥ 3 indicate moderate to severe disability. PDDS = patient determined disease steps; SBP = systolic blood pressure. AIC = Akaike information criterion; BIC = Bayesian information criterion.

Table e-2. Ordinary least squares models to predict PDDS scores (N = 92)\*

| Variable                                          | Model 1                 |         | Model 2                 |         | Model 3                 |         |
|---------------------------------------------------|-------------------------|---------|-------------------------|---------|-------------------------|---------|
|                                                   | Estimate (95% CI)       | P-Value | Estimate (95% CI)       | P-Value | Estimate (95% CI)       | P-Value |
| Intercept                                         | -2.524 (-5.944 - 0.896) | 0.146   | -2.536 (-6.032 - 0.961) | 0.153   | -2.556 (-6.069 - 0.958) | 0.152   |
| SBP variability tertiles [1 (Lowest Variability)] |                         |         |                         |         |                         |         |
| 2                                                 | 1.132 (0.280 - 1.985)   | 0.010   | 1.153 (0.263 - 2.044)   | 0.012   | 1.128 (0.228 - 2.028)   | 0.015   |
| 3 (Highest Variability)                           | 1.245 (0.426 - 2.065)   | 0.003   | 1.247 (0.402 - 2.092)   | 0.004   | 1.213 (0.355 - 2.072)   | 0.006   |
| Age                                               | 0.074 (0.045 - 0.104)   | < 0.001 | 0.075 (0.045 - 0.105)   | < 0.001 | 0.075 (0.045 - 0.105)   | < 0.001 |
| Female [ Male]                                    | 0.630 (-0.056 - 1.316)  | 0.071   | 0.625 (-0.071 - 1.321)  | 0.078   | 0.623 (-0.076 - 1.322)  | 0.080   |
| White Race [Other race/ethnicity]                 | 0.371 (-0.553 - 1.294)  | 0.427   | 0.363 (-0.575 - 1.302)  | 0.443   | 0.393 (-0.556 - 1.342)  | 0.413   |
| Within-subject mean SBP (mm Hg)                   | 0.000 (-0.028 - 0.028)  | 0.990   | 0.000 (-0.028 - 0.028)  | 0.996   | -0.004 (-0.036 - 0.028) | 0.805   |
| Hypertension                                      |                         |         | 0.016 (-0.718 - 0.750)  | 0.965   | -0.009 (-0.751 - 0.734) | 0.982   |
| Depression                                        |                         |         | -0.079 (-0.925 - 0.766) | 0.853   | -0.085 (-0.935 - 0.764) | 0.842   |
| Body mass index (kg/m <sup>2</sup> )              |                         |         |                         |         | 0.017 (-0.047 - 0.080)  | 0.597   |
| R <sup>2</sup>                                    | 0.368                   |         | 0.368                   |         | 0.370                   |         |
| Adjusted R <sup>2</sup>                           | 0.323                   |         | 0.307                   |         | 0.301                   |         |
| AIC                                               | 351.224                 |         | 355.183                 |         | 356.868                 |         |
| BIC                                               | 371.398                 |         | 380.400                 |         | 384.607                 |         |

\* Reference categories are in angle brackets. P-values were NOT corrected for multiple comparison. PDDS = patient determined disease steps;

SBP = systolic blood pressure. AIC = Akaike information criterion; BIC = Bayesian information criterion.

Table e-3. Ordinal logistic regression for MS patients in a higher disability group with the number of SBP measures as a covariate (N = 92)\*

| Variables                                        | Estimate (95% CI)      | P-Value |
|--------------------------------------------------|------------------------|---------|
| SBP variability tertiles [1 (Lowest Variability) |                        |         |
| 2                                                | 3.090 (0.959 - 9.956)  | 0.059   |
| 3 (Highest Variability)                          | 5.204 (1.576 - 17.182) | 0.007   |
| Age                                              | 1.101 (1.053 - 1.151)  | 0.000   |
| Female [Male]                                    | 2.598 (1.023 - 6.595)  | 0.045   |
| White Race [Other race/ethnicity]                | 1.333 (0.411 - 4.319)  | 0.632   |
| Within-subject mean SBP (mm Hg)                  | 1.013 (0.977 - 1.050)  | 0.489   |
| Number of within-subject SBP measures            | 1.084 (0.990 - 1.188)  | 0.083   |

\* Reference categories are in angle brackets. SBP = systolic blood pressure.

Table e-4. Ordinary least squares models to predict SBP variability before the study (N = 92)\*

| Variables                             | Model 1                 |         | Model 2                 |         | Model 3                 |         |
|---------------------------------------|-------------------------|---------|-------------------------|---------|-------------------------|---------|
|                                       | Estimate (95% CI)       | P-Value | Estimate (95% CI)       | P-Value | Estimate (95% CI)       | P-Value |
| Intercept                             | 0.098 (0.069 - 0.128)   | 0.000   | 0.042 (-0.027 - 0.110)  | 0.232   | 0.046 (-0.023 - 0.115)  | 0.189   |
| PDDS severity [1 (No or Mild)]        |                         |         |                         |         |                         |         |
| 2 (Moderate)                          | 0.010 (-0.009 - 0.029)  | 0.286   | 0.011 (-0.008 - 0.030)  | 0.256   | 0.011 (0.009 - 0.030)   | 0.274   |
| 3 (Severe)                            | 0.019 (-0.001 - 0.039)  | 0.059   | 0.019 (-0.001 - 0.040)  | 0.063   | 0.019 (-0.002 - 0.040)  | 0.070   |
| Age (per 100 y)                       | 0.000 (-0.001 - 0.001)  | 0.567   | 0.000 (-0.001 - 0.000)  | 0.340   | 0.000 (-0.001 - 0.000)  | 0.244   |
| Female [Male]                         | -0.004 (-0.019 - 0.010) | 0.544   | -0.006 (-0.020 - 0.009) | 0.424   | -0.005 (-0.020 - 0.009) | 0.468   |
| White Race [Other race/ethnicity]     | -0.018 (-0.038 - 0.002) | 0.075   | -0.017 (-0.037 - 0.003) | 0.097   | -0.015 (-0.036 - 0.005) | 0.137   |
| Within-subject mean SBP (mm Hg)       |                         |         | 0.001 (0.000 - 0.001)   | 0.056   | 0.001 (-0.000 - 0.001)  | 0.073   |
| Number of within-subject SBP measures |                         |         | 0.000 (-0.001 - 0.001)  | 0.958   | 0.000 (-0.001 - 0.001)  | 0.918   |
| BMI (kg/m <sup>2</sup> )              |                         |         |                         |         | -0.000 (-0.001 - 0.001) | 0.896   |
| Depression                            |                         |         |                         |         | 0.001 (-0.017 - 0.018)  | 0.954   |
| Hypertension                          |                         |         |                         |         | -0.013 (-0.029 - 0.001) | 0.078   |

\* Reference categories are in angle brackets. P-values are not corrected for multiple comparison. PDDS = patient determined disease steps; SBP = systolic blood pressure; BMI = body mass index.

1  
2  
3  
4  
5  
6  
7  
8  
9  
10  
11  
12  
13  
14  
15  
16  
17  
18  
19  
20  
21  
22  
23  
24  
25  
26  
27  
28  
29  
30  
31  
32  
33  
34  
35  
36  
37  
38  
39  
40  
41  
42  
43  
44  
45  
46  
47

Table e-5. Ordinary least squares models to predict SBP variability post study (N = 89)\*

| Variables                       | Model 1                 |         | Model 2                 |         | Model 3                 |         |
|---------------------------------|-------------------------|---------|-------------------------|---------|-------------------------|---------|
|                                 | Estimate (95% CI)       | P-Value | Estimate (95% CI)       | P-Value | Estimate (95% CI)       | P-Value |
| Intercept                       | 0.072 (0.041 - 0.103)   | < 0.001 | 0.008 (-0.069 - 0.084)  | 0.840   | 0.004 (-0.073 - 0.082)  | 0.909   |
| PDDS scores [1 (No or Mild)]    |                         |         |                         |         |                         |         |
| 2 (Moderate)                    | 0.031 (0.011 - 0.051)   | 0.003   | 0.030 (0.010 - 0.050)   | 0.004   | 0.029 (0.008 - 0.050)   | 0.007   |
| 3 (Severe)                      | 0.021 (0.000 - 0.042)   | 0.052   | 0.018 (-0.004 - 0.040)  | 0.101   | 0.018 (-0.004 - 0.040)  | 0.115   |
| Age (per 100 y)                 | 0.001 (-0.076 - 0.077)  | 0.990   | -0.005 (-0.082 - 0.072) | 0.892   | 0.000 (-0.001 - 0.001)  | 0.898   |
| Female                          | -0.007 (-0.023 - 0.008) | 0.357   | -0.009 (-0.024 - 0.007) | 0.265   | -0.008 (-0.024 - 0.007) | 0.285   |
| White Race                      | -0.005 (-0.026 - 0.016) | 0.655   | -0.002 (-0.023 - 0.019) | 0.862   | -0.001 (-0.023 - 0.020) | 0.891   |
| Within-subject mean SBP (mm Hg) |                         |         | 0.000 (0.000 - 0.001)   | 0.103   | 0.000 (-0.000 - 0.001)  | 0.247   |
| Within-subject BP measures      |                         |         | 0.001 (0.000 - 0.002)   | 0.228   | 0.001 (-0.001 - 0.002)  | 0.396   |
| BMI (kg/m <sup>2</sup> )        |                         |         |                         |         | 0.000 (-0.001 - 0.002)  | 0.516   |
| Depression                      |                         |         |                         |         | 0.010 (-0.009 - 0.029)  | 0.280   |
| Hypertension                    |                         |         |                         |         | 0.001 (-0.016 - 0.018)  | 0.876   |

\* Reference categories are in angle brackets. P-values are not corrected for multiple comparison. PDDS = patient determined disease steps; SBP = systolic blood pressure; BMI = body mass index.

# Reporting checklist for cohort study.

Based on the STROBE cohort guidelines.

## Instructions to authors

Complete this checklist by entering the page numbers from your manuscript where readers will find each of the items listed below.

Your article may not currently address all the items on the checklist. Please modify your text to include the missing information. If you are certain that an item does not apply, please write "n/a" and provide a short explanation.

Upload your completed checklist as an extra file when you submit to a journal.

In your methods section, say that you used the STROBE cohort reporting guidelines, and cite them as:

von Elm E, Altman DG, Egger M, Pocock SJ, Gøtzsche PC, Vandenbroucke JP. The Strengthening of Reporting of Observational Studies in Epidemiology (STROBE) Statement: guidelines for reporting observational studies.

|                           |                     |                                                                                    | Page   |
|---------------------------|---------------------|------------------------------------------------------------------------------------|--------|
|                           |                     | Reporting Item                                                                     | Number |
| <b>Title and abstract</b> |                     |                                                                                    |        |
| Title                     | <a href="#">#1a</a> | Indicate the study's design with a commonly used term in the title or the abstract | 1      |
| Abstract                  | <a href="#">#1b</a> | Provide in the abstract an informative and balanced summary                        | 2      |



of what was done and what was found

## Introduction

Background / [#2](#) Explain the scientific background and rationale for the 3  
 rationale investigation being reported

Objectives [#3](#) State specific objectives, including any prespecified 3  
 hypotheses

## Methods

Study design [#4](#) Present key elements of study design early in the paper 4

Setting [#5](#) Describe the setting, locations, and relevant dates, including 4  
 periods of recruitment, exposure, follow-up, and data collection

Eligibility criteria [#6a](#) Give the eligibility criteria, and the sources and methods of 4  
 selection of participants. Describe methods of follow-up.

Eligibility criteria [#6b](#) For matched studies, give matching criteria and number of N/A  
 exposed and unexposed

Variables [#7](#) Clearly define all outcomes, exposures, predictors, potential 4-5  
 confounders, and effect modifiers. Give diagnostic criteria, if applicable

Data sources / [#8](#) For each variable of interest give sources of data and details of 4-5  
 measurement methods of assessment (measurement). Describe comparability of assessment methods if there is more than one group. Give information separately for for exposed and unexposed groups if applicable.

|    |                |                      |                                                                   |     |
|----|----------------|----------------------|-------------------------------------------------------------------|-----|
| 1  | Bias           | <a href="#">#9</a>   | Describe any efforts to address potential sources of bias         | 5-6 |
| 2  |                |                      |                                                                   |     |
| 3  |                |                      |                                                                   |     |
| 4  | Study size     | <a href="#">#10</a>  | Explain how the study size was arrived at                         | 4   |
| 5  |                |                      |                                                                   |     |
| 6  |                |                      |                                                                   |     |
| 7  | Quantitative   | <a href="#">#11</a>  | Explain how quantitative variables were handled in the            | 4-5 |
| 8  | variables      |                      | analyses. If applicable, describe which groupings were chosen,    |     |
| 9  |                |                      | and why                                                           |     |
| 10 |                |                      |                                                                   |     |
| 11 |                |                      |                                                                   |     |
| 12 |                |                      |                                                                   |     |
| 13 |                |                      |                                                                   |     |
| 14 |                |                      |                                                                   |     |
| 15 | Statistical    | <a href="#">#12a</a> | Describe all statistical methods, including those used to control | 5-6 |
| 16 | methods        |                      | for confounding                                                   |     |
| 17 |                |                      |                                                                   |     |
| 18 |                |                      |                                                                   |     |
| 19 |                |                      |                                                                   |     |
| 20 | Statistical    | <a href="#">#12b</a> | Describe any methods used to examine subgroups and                | 5-6 |
| 21 | methods        |                      | interactions                                                      |     |
| 22 |                |                      |                                                                   |     |
| 23 |                |                      |                                                                   |     |
| 24 |                |                      |                                                                   |     |
| 25 |                |                      |                                                                   |     |
| 26 | Statistical    | <a href="#">#12c</a> | Explain how missing data were addressed                           | 5-6 |
| 27 | methods        |                      |                                                                   |     |
| 28 |                |                      |                                                                   |     |
| 29 |                |                      |                                                                   |     |
| 30 |                |                      |                                                                   |     |
| 31 | Statistical    | <a href="#">#12d</a> | If applicable, explain how loss to follow-up was addressed        | N/A |
| 32 | methods        |                      |                                                                   |     |
| 33 |                |                      |                                                                   |     |
| 34 |                |                      |                                                                   |     |
| 35 |                |                      |                                                                   |     |
| 36 | Statistical    | <a href="#">#12e</a> | Describe any sensitivity analyses                                 | 5-6 |
| 37 | methods        |                      |                                                                   |     |
| 38 |                |                      |                                                                   |     |
| 39 |                |                      |                                                                   |     |
| 40 |                |                      |                                                                   |     |
| 41 |                |                      |                                                                   |     |
| 42 | <b>Results</b> |                      |                                                                   |     |
| 43 |                |                      |                                                                   |     |
| 44 |                |                      |                                                                   |     |
| 45 | Participants   | <a href="#">#13a</a> | Report numbers of individuals at each stage of study—eg           | 6   |
| 46 |                |                      | numbers potentially eligible, examined for eligibility, confirmed |     |
| 47 |                |                      | eligible, included in the study, completing follow-up, and        |     |
| 48 |                |                      | analysed. Give information separately for for exposed and         |     |
| 49 |                |                      | unexposed groups if applicable.                                   |     |
| 50 |                |                      |                                                                   |     |
| 51 |                |                      |                                                                   |     |
| 52 |                |                      |                                                                   |     |
| 53 |                |                      |                                                                   |     |
| 54 |                |                      |                                                                   |     |
| 55 |                |                      |                                                                   |     |
| 56 |                |                      |                                                                   |     |
| 57 | Participants   | <a href="#">#13b</a> | Give reasons for non-participation at each stage                  | 6   |
| 58 |                |                      |                                                                   |     |
| 59 |                |                      |                                                                   |     |
| 60 |                |                      |                                                                   |     |

|    |                   |                      |                                                                   |         |
|----|-------------------|----------------------|-------------------------------------------------------------------|---------|
| 1  | Participants      | <a href="#">#13c</a> | Consider use of a flow diagram                                    | N/A     |
| 2  |                   |                      |                                                                   |         |
| 3  |                   |                      |                                                                   |         |
| 4  | Descriptive data  | <a href="#">#14a</a> | Give characteristics of study participants (eg demographic,       | 6-7     |
| 5  |                   |                      | clinical, social) and information on exposures and potential      |         |
| 6  |                   |                      | confounders. Give information separately for exposed and          |         |
| 7  |                   |                      | unexposed groups if applicable.                                   |         |
| 8  |                   |                      |                                                                   |         |
| 9  |                   |                      |                                                                   |         |
| 10 |                   |                      |                                                                   |         |
| 11 |                   |                      |                                                                   |         |
| 12 |                   |                      |                                                                   |         |
| 13 |                   |                      |                                                                   |         |
| 14 | Descriptive data  | <a href="#">#14b</a> | Indicate number of participants with missing data for each        | 6-7     |
| 15 |                   |                      | variable of interest                                              |         |
| 16 |                   |                      |                                                                   |         |
| 17 |                   |                      |                                                                   |         |
| 18 |                   |                      |                                                                   |         |
| 19 | Descriptive data  | <a href="#">#14c</a> | Summarise follow-up time (eg, average and total amount)           | N/A     |
| 20 |                   |                      |                                                                   |         |
| 21 |                   |                      |                                                                   |         |
| 22 |                   |                      |                                                                   |         |
| 23 | Outcome data      | <a href="#">#15</a>  | Report numbers of outcome events or summary measures              | 7       |
| 24 |                   |                      | over time. Give information separately for exposed and            |         |
| 25 |                   |                      | unexposed groups if applicable.                                   |         |
| 26 |                   |                      |                                                                   |         |
| 27 |                   |                      |                                                                   |         |
| 28 |                   |                      |                                                                   |         |
| 29 |                   |                      |                                                                   |         |
| 30 | Main results      | <a href="#">#16a</a> | Give unadjusted estimates and, if applicable, confounder-         | 7-8     |
| 31 |                   |                      | adjusted estimates and their precision (eg, 95% confidence        |         |
| 32 |                   |                      | interval). Make clear which confounders were adjusted for and     |         |
| 33 |                   |                      | why they were included                                            |         |
| 34 |                   |                      |                                                                   |         |
| 35 |                   |                      |                                                                   |         |
| 36 |                   |                      |                                                                   |         |
| 37 |                   |                      |                                                                   |         |
| 38 |                   |                      |                                                                   |         |
| 39 |                   |                      |                                                                   |         |
| 40 | Main results      | <a href="#">#16b</a> | Report category boundaries when continuous variables were         | 7-8,    |
| 41 |                   |                      | categorized                                                       | Table 1 |
| 42 |                   |                      |                                                                   |         |
| 43 |                   |                      |                                                                   |         |
| 44 |                   |                      |                                                                   |         |
| 45 | Main results      | <a href="#">#16c</a> | If relevant, consider translating estimates of relative risk into | 7-8     |
| 46 |                   |                      | absolute risk for a meaningful time period                        |         |
| 47 |                   |                      |                                                                   |         |
| 48 |                   |                      |                                                                   |         |
| 49 |                   |                      |                                                                   |         |
| 50 |                   |                      |                                                                   |         |
| 51 | Other analyses    | <a href="#">#17</a>  | Report other analyses done—e.g., analyses of subgroups and        | 8       |
| 52 |                   |                      | interactions, and sensitivity analyses                            |         |
| 53 |                   |                      |                                                                   |         |
| 54 |                   |                      |                                                                   |         |
| 55 |                   |                      |                                                                   |         |
| 56 | <b>Discussion</b> |                      |                                                                   |         |
| 57 |                   |                      |                                                                   |         |
| 58 |                   |                      |                                                                   |         |
| 59 |                   |                      |                                                                   |         |
| 60 |                   |                      |                                                                   |         |

|    |                          |                     |                                                                      |       |
|----|--------------------------|---------------------|----------------------------------------------------------------------|-------|
| 1  | Key results              | <a href="#">#18</a> | Summarise key results with reference to study objectives             | 8-9   |
| 2  |                          |                     |                                                                      |       |
| 3  |                          |                     |                                                                      |       |
| 4  | Limitations              | <a href="#">#19</a> | Discuss limitations of the study, taking into account sources of     | 11-12 |
| 5  |                          |                     | potential bias or imprecision. Discuss both direction and            |       |
| 6  |                          |                     | magnitude of any potential bias.                                     |       |
| 7  |                          |                     |                                                                      |       |
| 8  |                          |                     |                                                                      |       |
| 9  |                          |                     |                                                                      |       |
| 10 |                          |                     |                                                                      |       |
| 11 |                          |                     |                                                                      |       |
| 12 | Interpretation           | <a href="#">#20</a> | Give a cautious overall interpretation considering objectives,       | 10    |
| 13 |                          |                     | limitations, multiplicity of analyses, results from similar studies, |       |
| 14 |                          |                     | and other relevant evidence.                                         |       |
| 15 |                          |                     |                                                                      |       |
| 16 |                          |                     |                                                                      |       |
| 17 |                          |                     |                                                                      |       |
| 18 |                          |                     |                                                                      |       |
| 19 | Generalisability         | <a href="#">#21</a> | Discuss the generalisability (external validity) of the study        | 12    |
| 20 |                          |                     | results                                                              |       |
| 21 |                          |                     |                                                                      |       |
| 22 |                          |                     |                                                                      |       |
| 23 |                          |                     |                                                                      |       |
| 24 |                          |                     |                                                                      |       |
| 25 | <b>Other Information</b> |                     |                                                                      |       |
| 26 |                          |                     |                                                                      |       |
| 27 |                          |                     |                                                                      |       |
| 28 | Funding                  | <a href="#">#22</a> | Give the source of funding and the role of the funders for the       | 13    |
| 29 |                          |                     | present study and, if applicable, for the original study on which    |       |
| 30 |                          |                     | the present article is based                                         |       |
| 31 |                          |                     |                                                                      |       |
| 32 |                          |                     |                                                                      |       |
| 33 |                          |                     |                                                                      |       |
| 34 |                          |                     |                                                                      |       |
| 35 |                          |                     |                                                                      |       |

36 The STROBE checklist is distributed under the terms of the Creative Commons Attribution License  
37 CC-BY. This checklist was completed on 23. May 2019 using <https://www.goodreports.org/>, a tool  
38 made by the [EQUATOR Network](#) in collaboration with [Penelope.ai](#)  
39  
40  
41  
42  
43  
44  
45  
46  
47  
48  
49  
50  
51  
52  
53  
54  
55  
56  
57  
58  
59  
60

# BMJ Open

## A retrospective cohort study of the relationship between systolic blood pressure variability and multiple sclerosis disability

|                                 |                                                                                                                                                                                                                                                     |
|---------------------------------|-----------------------------------------------------------------------------------------------------------------------------------------------------------------------------------------------------------------------------------------------------|
| Journal:                        | <i>BMJ Open</i>                                                                                                                                                                                                                                     |
| Manuscript ID                   | bmjopen-2019-034355.R2                                                                                                                                                                                                                              |
| Article Type:                   | Original research                                                                                                                                                                                                                                   |
| Date Submitted by the Author:   | 20-Jan-2020                                                                                                                                                                                                                                         |
| Complete List of Authors:       | Goldman, Myla; Virginia Commonwealth University, Neurology<br>Min, Seulgi; University of Virginia<br>Mason Lobo, Jennifer ; University of Virginia, Public Health Sciences<br>Sohn, Min-Woong; University of Kentucky, Health Management and Policy |
| <b>Primary Subject Heading</b>: | Neurology                                                                                                                                                                                                                                           |
| Secondary Subject Heading:      | Cardiovascular medicine                                                                                                                                                                                                                             |
| Keywords:                       | Multiple sclerosis < NEUROLOGY, disability progression, blood pressure variability, cardiovascular comorbidities                                                                                                                                    |
|                                 |                                                                                                                                                                                                                                                     |

SCHOLARONE™  
Manuscripts



I, the Submitting Author has the right to grant and does grant on behalf of all authors of the Work (as defined in the below author licence), an exclusive licence and/or a non-exclusive licence for contributions from authors who are: i) UK Crown employees; ii) where BMJ has agreed a CC-BY licence shall apply, and/or iii) in accordance with the terms applicable for US Federal Government officers or employees acting as part of their official duties; on a worldwide, perpetual, irrevocable, royalty-free basis to BMJ Publishing Group Ltd ("BMJ") its licensees and where the relevant Journal is co-owned by BMJ to the co-owners of the Journal, to publish the Work in this journal and any other BMJ products and to exploit all rights, as set out in our [licence](#).

The Submitting Author accepts and understands that any supply made under these terms is made by BMJ to the Submitting Author unless you are acting as an employee on behalf of your employer or a postgraduate student of an affiliated institution which is paying any applicable article publishing charge ("APC") for Open Access articles. Where the Submitting Author wishes to make the Work available on an Open Access basis (and intends to pay the relevant APC), the terms of reuse of such Open Access shall be governed by a Creative Commons licence – details of these licences and which [Creative Commons](#) licence will apply to this Work are set out in our licence referred to above.

Other than as permitted in any relevant BMJ Author's Self Archiving Policies, I confirm this Work has not been accepted for publication elsewhere, is not being considered for publication elsewhere and does not duplicate material already published. I confirm all authors consent to publication of this Work and authorise the granting of this licence.

1  
2  
3  
4  
5  
6  
7  
8  
9 **A retrospective cohort study of the relationship between systolic blood pressure variability and**  
10 **multiple sclerosis disability**  
11

12  
13 Running title: Blood pressure variability and MS disability  
14  
15

16  
17  
18  
19  
20  
21  
22 Myla D. Goldman, MD, MSc;<sup>1</sup> Seulgi Min, BA;<sup>2</sup> Jennifer M. Lobo, Ph.D.;<sup>3</sup> Min-Woong Sohn,  
23 Ph.D.<sup>4</sup>  
24  
25

26  
27 <sup>1</sup> Department of Neurology, Virginia Commonwealth University, Richmond, Virginia

28 <sup>2</sup> College of Arts and Sciences, University of Virginia, Charlottesville, Virginia

29 <sup>3</sup> Department of Public Health Sciences, University of Virginia, Charlottesville, Virginia

30 <sup>4</sup> Department of Health Management and Policy, University of Kentucky College of Public  
31 Health, Lexington, Kentucky  
32  
33

34  
35 Corresponding Author:

36 Myla D. Goldman, MD, MSc  
37 Virginia Commonwealth University  
38 Department of Neurology  
39 1101 E. Marshall Street  
40 PO Box 980599  
41 **Phone:** (804) 828-9869  
42 **Fax:** (804) 827-1230  
43 **Email:** myla.goldman@vcuhealth.org  
44  
45  
46

47 Word count of Abstract: 268

48 Word count of Paper: 2733  
49  
50  
51  
52  
53  
54  
55  
56  
57  
58  
59  
60

## ABSTRACT

**Objective:** To examine the relationship between visit-to-visit systolic blood pressure (SBP) variability and patient-reported outcome measure of disability in multiple sclerosis (MS) patients.

**Design:** A retrospective cohort study of individuals with MS who completed a Patient Determined Disease Steps (PDDS) scale between 2011 – 2015 at a multiple sclerosis specialty clinic.

**Participants:** Individuals with MS for whom both a completed PDDS scale and  $\geq 3$  SBP measures within the prior 12 months of the survey were available.

**Main Outcome Measure:** Participants were grouped into three classes of disability (No or Mild (PDDS 0 - 1), Moderate (2 - 3), Severe (4 - 7)). SBP variability was calculated as within-subject standard deviations using all SBP measures taken during the past 12 months. SBP variability was analyzed by Tertile groups.

**Results:** Ninety-two subjects were included in this analysis. Mean PDDS score was  $2.22 \pm 1.89$ . Compared to subjects in Tertile 1 (lowest variability), the odds of being in a higher disability group was 3.5 times higher (OR = 3.48; 95% CI, 1.08 – 11.25;  $p = 0.037$ ) in Tertile 2 and 5.2 times higher (OR = 5.19; 95% CI, 1.53 – 17.61;  $p = 0.008$ ) in Tertile 3 (highest variability), independent of mean SBP, age, sex, race/ethnicity, BMI, and comorbidities ( $p$  for trend = 0.008). Mean PDDS scores were  $1.52 \pm 1.18$  in Tertile 1,  $2.73 \pm 1.02$  in Tertile 2 and  $2.42 \pm 0.89$  in Tertile 3 after adjusting for the same covariates.

**Conclusions:** Our results show a significant gradient relationship between SBP variability and MS-related disability. More research is needed to determine the underlying pathophysiological relationship between SBP variability and MS disability progression.



1  
2  
3 Keywords: multiple sclerosis, disability progression, blood pressure variability, cardiovascular  
4  
5 comorbidities  
6  
7  
8  
9  
10  
11  
12  
13  
14  
15  
16  
17  
18  
19  
20  
21  
22  
23  
24  
25  
26  
27  
28  
29  
30  
31  
32  
33  
34  
35  
36  
37  
38  
39  
40  
41  
42  
43  
44  
45  
46  
47  
48  
49  
50  
51  
52  
53  
54  
55  
56  
57  
58  
59  
60

## Article Summary

### Strengths and Limitations of This Study

- This is a first study to look at the relationship between the systolic blood pressure (SBP) variability and MS-related disability outcomes.
- This study paired prospectively collected patient-reported outcomes with retrospectively collected data, which allowed us to leverage existing data to take a first look at this novel question.
- Our analysis included a multi-faceted approach including - patient-reported measures, clinical outcomes (blood pressure), and concurrent co-morbid diagnosis.
- The retrospective collection of the paired clinical data limited the standardization of the number and inter-interval timing of blood pressure measurements, as well as the total number of subjects available for analysis.

### 1. Introduction

Multiple Sclerosis (MS) is an inflammatory and degenerative disorder of the central nervous system. Individuals with MS commonly experience some degree of disability progression independent of inflammatory driven events. The underlying mechanisms driving this inflammatory-independent disease progression remains poorly understood. It is likely that there is no single factor that drives MS progression. Instead it is believed to be a multi-faceted process with variable importance and influence of factors for any individual person. Posited factors include medical co-morbidities, as well as environmental factors such as smoking or vitamin D exposure.

1  
2  
3 Co-morbid cardiovascular disease (CVD) is more prevalent in MS relative to healthy  
4 populations. In MS patients, CVD is associated with worsened disease progression and reduced  
5 quality of life, although the mechanism remains uncertain.<sup>1-5</sup> Visit-to-visit systolic blood  
6 pressure (SBP) variability is an emerging risk factor for a wide array of health outcomes  
7 including CVD, kidney failure, cognitive dysfunction, diabetic complications, and all-cause  
8 mortality.<sup>6-10</sup> Excessive SBP variability ( $\geq 10$  within-subject standard deviation) has been  
9 associated with many of these outcomes independent of mean blood pressure and  
10 hypertension.<sup>8,11,12</sup> Evidence suggests that visit-to-visit blood pressure variability may have  
11 stronger effects on cardiovascular outcomes than that of measures taken during a single visit or  
12 by 24-hour ambulatory monitoring devices.<sup>13-15</sup> While various vascular comorbidities have been  
13 previously studied in the progression of MS, the relationship between SBP variability and MS  
14 progression has yet to be explored.

15  
16  
17 We conducted a retrospective cohort study to examine the relationship between SBP  
18 variability and self-reported MS disability. We hypothesized that higher SBP variability is  
19 associated with greater degree of disability among individuals with MS.

## 20 21 22 **2. Material and Methods**

### 23 24 25 **Study Design and Sample**

26  
27 We conducted a retrospective cohort study of individuals with MS who participated in  
28 research between 2011 and 2015 at the University of Virginia School of Medicine (UVA) and  
29 had previously prospectively completed the Patient Determined Disease Steps (PDDS) scale, a  
30 validated patient-reported outcome measure of MS disability.<sup>16-18</sup> The PDDS is a self-report tool  
31 of MS disability in which participants indicate their level of disability between 0 ('normal') and  
32

1  
2  
3 8 ('bedridden'), where 4 indicates "early cane" use. SBP measurements were obtained from  
4  
5 medical records and only those subjects with  $\geq 3$  available SBP measurements captured within  
6  
7 the 12 months prior to PDDS completion were included in the analysis. This study was approved  
8  
9 by the UVA institutional review board.  
10  
11

### 12 13 **Visit-to-visit variability of systolic blood pressure**

14  
15  
16 All available SBP measures within 12-months pre- and post-PDDS survey data were extracted  
17  
18 from the electronic medical records system. Within-subject means and standard deviations of  
19  
20 SBP were computed. Coefficient of variation was calculated by dividing the standard deviation  
21  
22 by the mean to obtain a measure of variability that was more independent of the mean than  
23  
24 standard deviation. We used the within-subject coefficients of variation to divide the study sample into  
25  
26 three equal-sized groups (tertiles), whose SBPCV ranges are 0.012 - 0.064 for Tertile 1 (the lowest  
27  
28 variability group), 0.065 – 0.087 for Tertile 2, and 0.089 – 0.172 for Tertile 3 (the highest variability  
29  
30 group).  
31  
32

### 33 34 **Covariates**

35  
36  
37 Demographic data (age, sex, and race/ethnicity) were collected. We searched with the  
38  
39 Clinical Data Repository, a data warehouse containing clinical information from patients treated  
40  
41 at the University of Virginia, for the 12-month period prior to the PDDS survey to identify co-  
42  
43 existing conditions including cardiovascular disease (ICD-9-CM codes, 410.xx – 414.xx, 428.xx,  
44  
45 431.xx, 434.xx, and 436.xx), peripheral vascular disease (443.9), diabetes (250.xx, 357.2,  
46  
47 362.01), depression (311.xx, 300.4, 296.20, 296.80, 296.89, 296.90), and hypertension (401.x).  
48  
49 In addition to the diagnostic codes, we classified hypertension in patients using the 140/90 mm  
50  
51 Hg per ACC/AHA guideline.<sup>19</sup> We also extracted body mass index (BMI) data within six months  
52  
53 of the PDDS survey completion date.  
54  
55  
56  
57  
58  
59  
60

## Statistical Analysis

We used multivariable regression analysis to examine the relationship between SBP variability and the PDDS disability rating. To best utilize the ordinal nature of our response variable (PDDS score)<sup>16,17</sup>, we estimated an ordinal logistic regression<sup>20</sup> and found that it did not satisfy the proportional odds assumption.<sup>20-22</sup> We tried several medically meaningful groupings to satisfy the assumption based on the PDDS scores and decided on three groups that make psychological and medical sense as distinctive groups as follows: No or Mild Disability (PDDS scores 0 or 1), Moderate Disability (PDDS scores 2 or 3), and Severe Disability (PDDS scores 4 or higher). The disability outcomes in these new groups were modeled using ordinal logistic regression as a function of SBP variability, adjusting for patient demographic data (age, sex, and race/ethnicity), mean SBP, BMI, hypertension, and depression.

As a sensitivity analysis, we defined the PDDS score 3 or above as presence of severe disability and modeled the binary response (0 = No or Mild Disability; 1 = Moderate to Severe Disability) using a logistic regression (Table e-1). Because SBP variability is found to be correlated with the number of measures used in computing the within-subject standard deviations, we controlled for the number of BP measures in another sensitivity analysis (Table e-2).

Finally, we tested whether PDDS scores can predict SBP variability before the study (Table e-3) and whether PDDS scores can predict SBP variability after the survey (Table e-4) by estimating linear regressions to predict pre- and post-survey SBP variability as a function of PDDS scores, adjusting for age, sex, race, and other covariates.

We used Stata SE v. 15.1 (StataCorp, College Station, TX) for all statistical analysis.

## Patient and Public Involvement

No patient involved.

### 3. Results

A total of 218 PDDS surveys were identified from available study data. Among these, 17 subjects had completed more than one PDDS survey; in such cases, the first available survey date with corresponding  $\geq 3$  SBP measures was utilized. No subject contributed more than once to the final data set. When the same respondent participated in the PDDS survey more than once, we used the first survey. Of the resultant subjects, only 94 had the requisite  $\geq 3$  blood pressure measures in the 12-months prior to the survey completion date. Two additional subjects were excluded due to lack of available records to permit BMI calculation (absent height and/or weight).

The resultant 92 subjects included in the final analysis had a mean age of  $44.7 \pm 12.2$  years at the time of PDDS survey completion. They were predominantly white (82.6%) and 54% female. Their mean SBP was  $124.1 \pm 13.2$  mm Hg overall and were highest in Tertile 1 ( $128.0 \pm 13.0$  mm Hg) and lowest in Tertile 2 ( $125.8 \pm 13.0$  mm Hg). Their within-subject SBP standard deviation was  $9.9 \pm 4.6$  mm Hg overall but changed from  $5.8 \pm 2.1$  mm Hg (interquartile range [IQR] 4.4 – 7.4 mm Hg) to  $9.2 \pm 1.4$  mm Hg (IQR 11.7 – 17.7 mm Hg) in Tertile 2, and  $14.8 \pm 3.9$  (IQR 8.5 – 10.2 mm Hg) in Tertile 3. Their mean BMI was  $29.0$  kg/m<sup>2</sup>. A total of 19 (20.7%) had depression, 28 (30.4%) had hypertension (11 patients with a diagnosis in ICD-9-CM and 17 patients with elevated mean BP). We could not identify any subject with vascular

1  
2  
3 comorbidities except for one who had acute myocardial infarction and was in Tertile 2. For this  
4  
5 reason, vascular comorbidities have not been used in any subsequent analyses. The mean and  
6  
7 median PDDS score was  $2.2 \pm 1.89$  and 2 (IQR 0 – 4). Forty patients (43.5%) had no or mild  
8  
9 disability, 27 (29.4%) had moderate disability, and 25 (27.2%) had severe disability (Table 1).

12 Participants included in the analysis were not significantly different from those excluded  
13  
14 (n = 126) in terms of PDDS score, patient sex, race and body mass index (Table 2). However,  
15  
16 included subjects were older (48.7 vs 44.7 years; p = 0.016), less hypertensive (30.4% vs 52.4%;  
17  
18 p = 0.001) and more depressed (20.7% vs 5.6%; p < 0.001).

21 Results from ordinal logistic regression analyses are shown in Table 3. Compared to  
22  
23 subjects in Tertile 1 (lowest variability), the odds of being in a higher disability group was 3.5  
24  
25 times higher (OR = 3.48; 95% CI, 1.08 – 11.25; p = 0.037) in Tertile 2 and 5.2 times higher (OR  
26  
27 = 5.19; 95% CI, 1.53 – 17.61; p = 0.008) in Tertile 3 (highest variability), independent of mean  
28  
29 SBP, age, sex, race/ethnicity, BMI, hypertension and depression (p for trend = 0.008). Mean  
30  
31 PDDS scores were  $1.52 \pm 1.18$  in Tertile 1,  $2.73 \pm 1.02$  in Tertile 2 and  $2.42 \pm 0.89$  in Tertile 3 after  
32  
33 adjusting for the same covariates as the model shown in Table 3.

37 For sensitivity analysis, we checked the robustness of this association by estimating a  
38  
39 logistic regression that predicted the binary indicator of PDDS score 3 or above (moderate or  
40  
41 severe disability) (Tables e-1). The sensitivity analysis showed a significant relationship between  
42  
43 SBP variability and disability ratings assessed by PDDS scale persisted.

46 We checked whether the number of SBP measures used to compute the variability is a  
47  
48 confounding factor between the variability and the PDDS outcome by estimating the model  
49  
50 shown in Table 2 with the number of measures as an additional covariate (Table e-2). The  
51  
52 significant gradient relationship persisted in this model as well (p for trend = 0.007).

1  
2  
3 Finally, we tested the potential multi-directionality of the relationship between PDDS  
4 scores and SBP variability by predicting the SBP variability before and after the study using  
5 PDDS scores. From the 92 included subjects, 89 subjects had available  $\geq 3$  post-survey SBP  
6 measures, for whom the pre- and post-survey SBP coefficients of variation were correlated at  $r =$   
7 0.10 ( $p = 0.349$ ), while SBP means were correlated at  $r = 0.83$  ( $p < 0.001$ ). We estimated two  
8 regression models that predict pre-survey and post-survey SBP coefficient of variation using  
9 PDDS scores, after controlling for age, sex, and race. PDDS scores did not predict pre-survey  
10 variability in any model specification (Table e-3). On the other hand, those with moderate  
11 disability had 0.03 higher post-survey coefficient of variation in SBP (95% CI, 0.01 – 0.05;  $p =$   
12 0.003) compared to those with no or mild disability but the severe disability group did not have  
13 significantly different SBP variability from the no or mild group. Mean SBP, number of BP  
14 measures, or any other comorbidities did not change this association (Table e-4). These tests of  
15 directionality of the association between SBP variability and PDDS scores are summarized in  
16 Figure 1.

#### 35 4. Discussion

37  
38 Our results demonstrate a significant and strong graded relationship between SBP  
39 variability and self-reported disability outcome measures (PDDS) among MS patients. Patients in  
40 Tertile 3 (highest variability) had an approximately six times higher risk of being in the higher  
41 disability group compared to those in Tertile 1 (lowest variability). This relationship was  
42 independent of mean SBP, BMI, hypertension, depression, and patient demographic factors. This  
43 result was robust to different analytic methods such as logistic regression to predict PDDS score  
44 3 or higher (presence of moderate to severe disability).



1  
2  
3 Another important finding in this study is that the association of excessive SBP  
4 variability with higher PDDS scores can occur in normotensive individuals. Indeed, overall, 70%  
5 of our cohort were normotensive (< 140/90 mm Hg) or without hypertension diagnosis. They  
6 also had lower rates of hypertension in higher SBP variability tertiles with the lowest proportion  
7 observed in Tertile 3 (19% vs 41% in Tertile 1), a group with the highest SBP variability. This  
8 finding is consistent with previous studies by Sohn and his colleagues on diabetic  
9 complications.<sup>8,11,12</sup> Our results also demonstrate that mean SBP was not significantly associated  
10 with PDDS groups, suggesting there may be a different physiologic mechanism at play, not  
11 simply elevated blood pressures.<sup>13</sup>  
12  
13  
14  
15  
16  
17  
18  
19  
20  
21  
22  
23

24 Excessive visit-to-visit SBP variability has been associated with cardiovascular and  
25 several other health outcomes. To our knowledge, this is the first study to show that excessive  
26 visit-to-visit SBP variability may be a risk factor to MS disability progression. Previously,  
27 several large studies have identified a relationship between vascular comorbidities and MS  
28 outcomes, both clinical and patient-reported, using diagnostic codes (e.g., hypertension) or  
29 medications (anti-hypertensives) to classify patients.<sup>1-4</sup> Our results confirm the previous  
30 diagnosis-based research and extends that work, by identifying excessive SBP variability as a  
31 contributing factor to the previously identified relationship between blood-pressure changes and  
32 MS. Our results further suggest that a relevant hemodynamic mechanism in the interplay  
33 between cardiovascular disease and MS disability progression, is not simply hypertension (i.e.,  
34 elevated mean BP), but also excessive SBP variability.  
35  
36  
37  
38  
39  
40  
41  
42  
43  
44  
45  
46  
47  
48  
49

50 Pathophysiological mechanisms involved in the relationship between blood pressure  
51 variability and health outcomes are currently explained by arterial stiffness, endothelial  
52 dysfunction, and subclinical inflammation.<sup>23-26</sup> Several factors known to increase blood pressure  
53  
54  
55  
56  
57  
58  
59  
60

1  
2  
3 variability include autonomic dysfunction<sup>27</sup>, low hydration status<sup>28</sup>, insulin dysregulation<sup>29,30</sup> and  
4  
5 sleep-apnea<sup>31</sup> are commonly found in patients with MS. Tettey et al. suggests that vascular  
6  
7 comorbidities may activate the inflammatory cascade that ultimately leads to neurodegeneration  
8  
9 which manifests in disability progression in MS.<sup>2</sup> They also suggested that cerebral endothelial  
10  
11 dysfunction may be involved in “trans-endothelial migration of T-lymphocytes and monocytes to  
12  
13 the CNS with destructive and often neurodegenerative consequences.”<sup>2</sup> Our results suggest that  
14  
15 excessive SBP variability could be a relevant factor in that postulated inflammatory cascade in  
16  
17 the vasculature and that may contribute to the cerebral endothelial dysfunction, which combine  
18  
19 to produce the MS disability progression we observed in our study. More research is needed to  
20  
21 test whether excessive SBP variability is indeed implicated in these pathways.  
22  
23  
24  
25

26  
27 It is still premature to derive any MS-related clinical implications from our results. But it  
28  
29 is advisable that MS patients be checked for SBP variability and those with excessive variability  
30  
31 (e.g., within-subject standard deviation of 8 or higher) be recommended for careful vascular  
32  
33 evaluation. Interestingly, we found that the majority of patients we identified as having  
34  
35 hypertension according to the JNC7<sup>32</sup> and 2017 ACC/AHA criteria<sup>19</sup> did not have an actual  
36  
37 diagnosis of hypertension. This suggests a potential under-diagnosis of hypertension, at least in  
38  
39 our cohort.  
40  
41  
42

43  
44 This cross-sectional study was not designed to make any causal inferences between SBP  
45  
46 variability and PDDS scores. However, our sensitivity analyses suggest that, while SBP  
47  
48 variability was a strong and significant predictor of PDDS scores, the latter did not predict the  
49  
50 former. Our data further suggest that the PDDS scores could significantly predict post-survey  
51  
52 SBP variability but that the pre- and post-survey SBP variabilities were not correlated ( $r = 0.10$ ;  
53  
54  $p = 0.349$ ). This lends credence to the notion that SBP variability can in fact be a prognostic  
55  
56  
57  
58  
59  
60

1  
2  
3 factor for future disability progression and that there may be a vicious cycle of increasing SBP  
4  
5  
6 variability and worsening disability feeding each other dynamically over time.  
7

8  
9       There are limitations to our work. This is a retrospective study in design and we relied on  
10  
11 the Clinical Data Repository for our health system as a source of blood pressure measures and  
12  
13 comorbid conditions. Accuracy of these values is not known. Second, we were limited in sample  
14  
15 size, mainly because the majority of patients in the original study sample were excluded because  
16  
17 they lacked the requisite number of SBP measures. Therefore, our results should be cautiously  
18  
19 interpreted because of the potential for selection bias arising from requiring 3 or more SBP  
20  
21 measures within 12 months prior PDDS measurement. However, a bivariate comparison of the  
22  
23 included vs excluded patients in Table 2 showed that they are similar in demographic factors,  
24  
25 with the noted exception of age and depression, both of which were higher in the included  
26  
27 population. These factors may have resulted in higher visit frequency leading to more available  
28  
29 SBP values in those meeting eligibility criteria. Interestingly, the included population had lower  
30  
31 incidence of hypertension compared to excluded subjects, as identified by ICD-9-CM codes or  
32  
33 BP measures taken during the one-year period prior to the survey completion. We were only able  
34  
35 to capture BP measures documented in our institutional electronic-medical records and there may  
36  
37 have been additional values measured by other providers that were not captured in our data. We  
38  
39 were not able to control for some potential confounders, including MS disease duration, disease  
40  
41 modifying treatments, and some comorbid conditions that might have affected disability  
42  
43 outcomes in our data. In addition, while validated, PDDS is a patient-reported outcome that may  
44  
45 have unknown response bias. Despite these limitations, we believe our results represent an  
46  
47 important first step in studying this relationship.  
48  
49  
50  
51  
52  
53  
54  
55  
56  
57  
58  
59  
60

1  
2  
3 In conclusion, our results show that excessive SBP variability is associated with  
4 increased disability in MS patients, independent of mean SBP, hypertension diagnosis,  
5 depression, and obesity. This may represent a novel mechanism which may mediate the  
6 relationship between vascular dysfunction and progression of MS disability. Further prospective  
7 studies are needed to confirm whether excessive SBP variability is linked to the subclinical  
8 inflammation markers and/or cerebral endothelial dysfunction, and other markers of disease  
9 progression.  
10  
11  
12  
13  
14  
15  
16  
17  
18  
19  
20  
21  
22  
23  
24  
25  
26  
27  
28  
29  
30  
31  
32  
33  
34  
35  
36  
37  
38  
39  
40  
41  
42  
43  
44  
45  
46  
47  
48  
49  
50  
51  
52  
53  
54  
55  
56  
57  
58  
59  
60

### **Declaration of Conflicting Interests**

Myla D. Goldman has served as a consultant for ADAMAS, Celgene, EMD Serono, Novartis Pharmaceuticals, Sanofi Genzyme, Teva Pharmaceuticals. She has received research funding from Biogen Idec, Novartis Pharmaceuticals, National MS Society, MedDay Pharmaceuticals, and PCORI.

Seulgi Min reports no disclosures.

Jennifer M. Lobo reports no disclosures.

Min-Woong Sohn reports no disclosures.

### **Funding**

This research did not receive any specific grant from funding agencies in the public, commercial, or not-for-profit sectors. This work was supported by philanthropic funds provided by the ziMS Foundation.

### **Data Availability Statement**

Anonymized data not published within this article are available from the corresponding author (MDG) on reasonable request.

### **Author Statement**

Myla D. Goldman, MD, MSc - Study concept and design, acquisition of data, analysis and interpretation of data, and drafting/revising the manuscript

Seulgi Min, BA - Acquisition of data, drafting/revising the manuscript

Jennifer M. Lobo, PhD - Diagram creation, drafting/revising the manuscript

Min-Woong Sohn, PhD - Study concept and design, analysis and interpretation of data, statistical analysis, and drafting/revising the manuscript

1  
2  
3 Figure 1. Summary of the significant relationships (solid arrows) and nonsignificant relationships  
4 (dashed arrows) between SBP variability and PDDS scores\*  
5  
6  
7

8 [Figure 1 Here]  
9  
10

11 \* Pre-survey SBP variability was significantly predictive of PDDS scores ( $p = 0.015$ ), and PDDS scores  
12 were predictive of post-survey PDDS variability ( $p = 0.011$ ). PDDS scores did not predict pre-survey SBP  
13 variability, and pre-survey SBP variability did not predict post-survey SBP variability. The p-values were  
14 obtained from a Wald test with 2 degrees of freedom (pre-survey variability to PDDS) and from an F test  
15 with 2 and 83 degrees of freedom (PDDS to post-survey variability).  
16  
17  
18  
19  
20  
21  
22  
23  
24  
25  
26  
27  
28  
29  
30  
31  
32  
33  
34  
35  
36  
37  
38  
39  
40  
41  
42  
43  
44  
45  
46  
47  
48  
49  
50  
51  
52  
53  
54  
55  
56  
57  
58  
59  
60

Table 1. Characteristics of Study Cohort (N = 92) \*

| Variable                                        | Tertiles of SBP coefficient of variation |                        |                |                         | P-Value |
|-------------------------------------------------|------------------------------------------|------------------------|----------------|-------------------------|---------|
|                                                 | All                                      | 1 (Lowest Variability) | 2              | 3 (Highest Variability) |         |
|                                                 | N (%)                                    | N (%)                  | N (%)          | N (%)                   |         |
| All, n (Row %)                                  | 92 (100.00%)                             | 31 (33.70%)            | 30 (32.61%)    | 31 (33.70%)             |         |
| Age, mean (SD)                                  | 44.71 (12.16)                            | 45.03 (14.29)          | 45.93 (12.54)  | 43.19 (9.41)            | 0.673   |
| Female                                          | 50 (54.35%)                              | 18 (58.06%)            | 20 (66.67%)    | 12 (38.71%)             | 0.080   |
| White Race                                      | 76 (82.61%)                              | 29 (93.55%)            | 25 (83.33%)    | 22 (70.97%)             | 0.063   |
| Within-subject SBP                              |                                          |                        |                |                         |         |
| Mean (mm Hg), mean (SD)                         | 124.05 (13.19)                           | 128.01 (12.98)         | 118.16 (11.86) | 125.78 (13.00)          | 0.008   |
| Standard deviation (mm Hg), mean (SD)           | 9.94 (4.59)                              | 5.82 (2.05)            | 9.17 (1.41)    | 14.79 (3.91)            | < 0.001 |
| Maximum (mm Hg), mean (SD)                      | 137.95 (15.11)                           | 135.74 (13.70)         | 132.60 (12.37) | 145.32 (16.34)          | 0.002   |
| Minimum (mm Hg), mean (SD)                      | 110.68 (14.19)                           | 120.45 (13.11)         | 105.43 (11.24) | 106.00 (12.95)          | < 0.001 |
| Number of measures, mean (SD)                   | 7.93 (5.53)                              | 6.29 (3.97)            | 10.33 (6.18)   | 7.26 (5.57)             | 0.011   |
| Body mass index (kg/m <sup>2</sup> ), mean (SD) | 29.03 (6.02)                             | 28.73 (5.64)           | 28.04 (5.25)   | 30.28 (6.99)            | 0.330   |
| Depression                                      | 19 (20.65%)                              | 4 (12.90%)             | 11 (36.67%)    | 4 (12.90%)              | 0.031   |
| Hypertension                                    | 28 (30.43%)                              | 13 (41.94%)            | 9 (30.00%)     | 6 (19.35%)              | 0.154   |
| PDDS Score, mean (SD)                           | 2.22 (1.89)                              | 1.52 (1.95)            | 2.73 (1.70)    | 2.42 (1.86)             | 0.031   |
| PDDS Score, median (Interquartile Range)        | 2 (0 – 4)                                | 0 (0 – 3)              | 3 (1 – 4)      | 2 (1 - 4)               |         |
| PDDS Score (3 Groups)                           |                                          |                        |                |                         |         |
| No or Mild (0, 1)                               | 40 (43.48%)                              | 19 (61.29%)            | 9 (30.00%)     | 12 (38.71%)             | 0.163   |
| Moderate (2, 3)                                 | 27 (29.35%)                              | 6 (19.35%)             | 11 (36.67%)    | 10 (32.26%)             |         |
| Severe (4 or higher)                            | 25 (27.17%)                              | 6 (19.35%)             | 10 (33.33%)    | 9 (29.03%)              |         |

\* SBP = systolic blood pressure; SD = standard deviation; PDDS = patient determined disease steps. All percentages are either column percentages (Col %) or row percentages (Row %). P-values for continuous variables were computed using one-way ANOVA and those for categorical variables were based on Pearson chi-square tests.

Table 2. Comparison of the included and excluded patients in the original cohort\*

| Variables                           | All           | Excluded      | Included      | P-Value |
|-------------------------------------|---------------|---------------|---------------|---------|
|                                     | N (Col %)     | N (Row %)     | N (Row %)     |         |
| All                                 | 218 (100.00%) | 126 (57.80%)  | 92 (42.20%)   |         |
| Age, mean (SD)                      | 47.04 (12.24) | 44.71 (12.16) | 48.74 (12.06) | 0.016   |
| Female                              | 113 (51.83%)  | 63 (50.00%)   | 50 (54.35%)   | 0.526   |
| White Race                          | 181 (83.03%)  | 105 (83.33%)  | 76 (82.61%)   | 0.888   |
| BMI (kg/m <sup>2</sup> ), mean (SD) | 28.25 (6.19)  | 29.03 (6.02)  | 27.59 (6.29)  | 0.102   |
| Hypertension                        | 94 (43.12%)   | 66 (52.38%)   | 28 (30.43%)   | 0.001   |
| Depression                          | 26 (11.93%)   | 7 (5.56%)     | 19 (20.65%)   | < 0.001 |
| PDDS Score, mean (SD)               | 2.05 (1.81)   | 2.22 (1.89)   | 1.93 (1.75)   | 0.247   |
| PDDS Score (3 Groups)               |               |               |               |         |
| No or Mild (0, 1)                   | 95 (43.58%)   | 55 (43.65%)   | 40 (43.48%)   | 0.212   |
| Moderate (2, 3)                     | 75 (34.40%)   | 48 (38.10%)   | 27 (29.35%)   |         |
| Severe (4 or higher)                | 48 (22.02%)   | 23 (18.25%)   | 25 (27.17%)   |         |

\* SD = standard deviation; BMI = body mass index; PDDS = patient determined disease steps.



Table 3. Ordinal logistic regression results for MS patients in a higher disability group (N = 92)\*

| Variables                                                         | Estimate (95% CI)      | P-Value |
|-------------------------------------------------------------------|------------------------|---------|
| Tertiles of SBP coefficient of variation [1 (Lowest Variability)] |                        |         |
| 2                                                                 | 3.480 (1.077 - 11.251) | 0.037   |
| 3 (Highest Variability)                                           | 5.193 (1.531 - 17.616) | 0.008   |
| Age                                                               | 1.100 (1.051 - 1.150)  | < 0.001 |
| Female [Male]                                                     | 3.177 (1.249 - 8.078)  | 0.015   |
| White Race [Other Races/Ethnicity]                                | 1.495 (0.450 - 4.963)  | 0.512   |
| Within-subject mean SBP (mm Hg)                                   | 0.991 (0.952 - 1.031)  | 0.647   |
| Hypertension                                                      | 0.930 (0.356 - 2.430)  | 0.882   |
| Depression                                                        | 1.183 (0.426 - 3.289)  | 0.747   |
| Body mass index (kg/m <sup>2</sup> )                              | 1.057 (0.974 - 1.147)  | 0.186   |

\* Reference categories are in angle brackets. Disability groups were defined as No or Mild (PDDS scores 0 or 1), Moderate (2 or 3), and Severe (4 or higher).

1  
2  
3  
4  
5  
6  
7  
8  
9  
10  
11  
12  
13  
14  
15  
16  
17  
18  
19  
20  
21  
22  
23  
24  
25  
26  
27  
28  
29  
30  
31  
32  
33  
34  
35  
36  
37  
38  
39  
40  
41  
42  
43  
44  
45  
46  
47

For peer review only

## REFERENCES

1. Dagan A, Gringouz I, Kliers I, Segal G. Disability Progression in Multiple Sclerosis Is Affected by the Emergence of Comorbid Arterial Hypertension. *J Clin Neurol*. 2016;12(3):345-350.
2. Tettey P, Simpson S, Jr., Taylor BV, van der Mei IA. Vascular comorbidities in the onset and progression of multiple sclerosis. *Journal of the neurological sciences*. 2014;347(1-2):23-33.
3. Marrie R, Rudick R, Horwitz R, et al. Vascular comorbidity is associated with more rapid disability progression in multiple sclerosis. *Neurology*. 2010;13(74):1041-1047.
4. Conway D, Thompson N, Cohen J. Influence of hypertension, diabetes, hyperlipidemia, and obstructive lung disease on multiple sclerosis disease course *MSJ*. 2016;23:277-285.
5. Marrie R, Horwitz R, Cutter G, Tyry T. Cumulative impact of comorbidity on quality of life in MS. *Acta Neurologica Scandinavica*. 2012;125(3):180-186.
6. Hata J, Arima H, Rothwell PM, et al. Effects of visit-to-visit variability in systolic blood pressure on macrovascular and microvascular complications in patients with type 2 diabetes mellitus: the ADVANCE trial. *Circulation*. 2013;128(12):1325-1334.
7. Rothwell PM, Howard SC, Dolan E, et al. Prognostic significance of visit-to-visit variability, maximum systolic blood pressure, and episodic hypertension. *Lancet*. 2010;375(9718):895-905.
8. Sohn M, Epstein N, Huang E, et al. Visit-to-visit systolic blood pressure variability and microvascular complications among patients with diabetes. *Journal of Diabetes and Its Complications*. 2016.
9. Epstein NU, Lane KA, Farlow MR, et al. Cognitive dysfunction and greater visit-to-visit systolic blood pressure variability. *J Am Geriatr Soc*. 2013;61(12):2168-2173.
10. Okada H, Fukui M, Tanaka M, et al. Visit-to-Visit Blood Pressure Variability Is a Novel Risk Factor for the Development and Progression of Diabetic Nephropathy in Patients With Type 2 Diabetes. *Diabetes Care*. 2013.
11. Budiman-Mak E, Epstein N, Brennan M, et al. Systolic Blood Pressure Variability and Lower Extremity Amputation In a Non-Elderly Diabetic Population. *Diabetes Res Clin Pract*. 2016.
12. Brennan MB, Guihan M, Budiman-Mak E, et al. Increasing SBP variability is associated with an increased risk of developing incident diabetic foot ulcers. *J Hypertens*. 2018.
13. Rothwell PM. Limitations of the usual blood-pressure hypothesis and importance of variability, instability, and episodic hypertension. *Lancet*. 2010;375(9718):938-948.
14. Mancia G, Facchetti R, Parati G, Zanchetti A. Visit-to-visit blood pressure variability, carotid atherosclerosis, and cardiovascular events in the European Lacidipine Study on Atherosclerosis. *Circulation*. 2012;126(5):569-578.
15. Tao Y, Xu J, Song B, et al. Short-term blood pressure variability and long-term blood pressure variability: which one is a reliable predictor for recurrent stroke. *Journal of human hypertension*. 2017;31(9):568-573.
16. Hohol M, Orav E, Weiner H. Disease Steps in multiple sclerosis: A simple approach to evaluate disease progression. *Neurology*. 1995;45:251-255.
17. Hohol M, Orav E, Weiner H. Disease Steps in multiple sclerosis: a longitudinal study comparing disease steps and EDSS to evaluate disease progression. *Multiple Sclerosis*. 1999(5):349-354.
18. Marrie R, Goldman M. Validity of performance scales for disability assessment in multiple sclerosis. *Multiple Sclerosis*. 2007;13(9):1176-1182.
19. Whelton PK, Carey RM. The 2017 American College of Cardiology/American Heart Association Clinical Practice Guideline for High Blood Pressure in Adults. *JAMA Cardiol*. 2018;3(4):352-353.
20. Agresti A. *Categorical data analysis*. 3rd ed. Hoboken, NJ: Wiley; 2012.
21. Brant R. Assessing proportionality in the proportional odds model for ordinal logistic regression. *Biometrics*. 1990;46(4):1171-1178.
22. Agresti A. *An introduction to categorical data analysis*. New York: Wiley; 1996.

- 1  
2  
3 23. Muntner P, Whittle J, Lynch A, Colantonio L, et.al. Visit-to-Visit Variability of Blood Pressure  
4 and Coronary Heart Disease, Stroke, Heart Failure, and Mortality: A Cohort Study. *Annals of*  
5 *Internal Medicine*. 2015;163(5):329-338.
- 6 24. Shimbo D, Shea S, McClelland R, al. e. Associations of aortic distensibility and arterial elasticity  
7 with long-term visit-to-visit blood pressure variability: the Multi-Ethnic Study of Atherosclerosis  
8 (MESA). . *American journal of hypertension*. 2013;23:896–902.
- 9 25. Nagai M, Hoshide S, Ishikawa J, Shimada K, Kario K. Visit-to-visit blood pressure variations:  
10 new independent determinants for carotid artery measures in the elderly at high risk of  
11 cardiovascular disease. . *Journal of the American Society of Hypertension*. 2011;5(3):184–119.
- 12 26. Diaz K, Veerabhadrapa P, Kashem M, al. e. Relationship of visit-to-visit and ambulatory blood  
13 pressure variability to vascular function in African Americans. . *Hypertension research : official*  
14 *journal of the Japanese Society of Hypertension*. 2012;35(5):55-61.
- 15 27. Adamec I, Habek M. Autonomic dysfunction in multiple sclerosis. *clinical neurol neurosurg*.  
16 2013;115:s73-78.
- 17 28. Cincotta MC, Engelhard MM, Stankey M, Goldman MD. Fatigue and fluid hydration status in  
18 multiple sclerosis: A hypothesis. *Multiple Sclerosis Journal*. 2016;22(11):1438-1443.
- 19 29. Penesova A, Vlcek M, Imrich R, et al. Hyperinsulinemia in newly diagnosis patients with  
20 multiple sclerosis. *Metabolic Brain Disease*. 2015;4:895-901.
- 21 30. Goldman M, Koenig S, Yeamans R, Johnston K. A study of Insuling Resistance In Multiple  
22 Sclerosis Subjects and Healthy Controls. *American Academy of Neurology, Abstract P6171*.  
23 2014.
- 24 31. Brass Sea. Sleep disorders in patients with multiple sclerosis. *Sleep Medicine Reviews*.  
25 2010(14):121-129.
- 26 32. Chobanian AV, Bakris GL, Black HR, et al. Seventh report of the Joint National Committee on  
27 Prevention, Detection, Evaluation, and Treatment of High Blood Pressure. *Hypertension*.  
28 2003;42(6):1206-1252.
- 29  
30  
31  
32  
33  
34  
35  
36  
37  
38  
39  
40  
41  
42  
43  
44  
45  
46  
47  
48  
49  
50  
51  
52  
53  
54  
55  
56  
57  
58  
59  
60

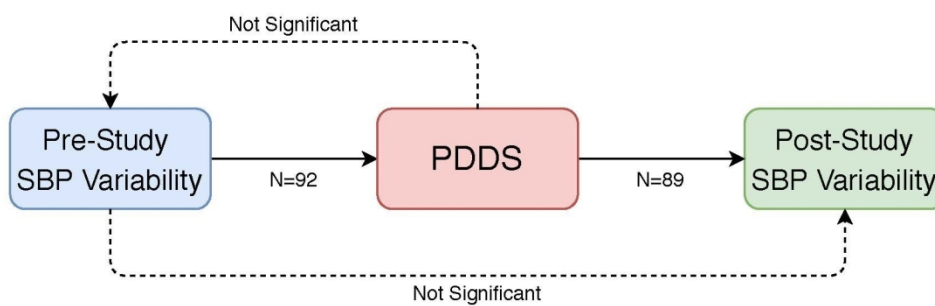

Figure 1. Summary of the significant relationships (solid arrows) and nonsignificant relationships (dashed arrows) between SBP variability and PDDS scores\*

474x166mm (96 x 96 DPI)

Table e-1. Logistic regression results for patients having PDDS scores ≥3 (N = 92)\*

| Variable                                          | Model 1                |         | Model 2                |         | Model 3                |         |
|---------------------------------------------------|------------------------|---------|------------------------|---------|------------------------|---------|
|                                                   | OR (95% CI)            | P-Value | OR (95% CI)            | P-Value | OR (95% CI)            | P-Value |
| SBP variability tertiles [1 (Lowest Variability)] |                        |         |                        |         |                        |         |
| 2                                                 | 7.098 (1.745 - 28.862) | 0.006   | 7.767 (1.822 - 33.105) | 0.006   | 7.662 (1.783 - 32.928) | 0.006   |
| 3 (Highest Variability)                           | 4.564 (1.210 - 17.213) | 0.025   | 4.338 (1.124 - 16.749) | 0.033   | 4.273 (1.106 - 16.514) | 0.035   |
| Age                                               | 1.106 (1.047 - 1.168)  | < 0.001 | 1.107 (1.047 - 1.170)  | < 0.001 | 1.109 (1.048 - 1.174)  | < 0.001 |
| Female [ Male]                                    | 2.079 (0.718 - 6.020)  | 0.177   | 2.186 (0.741 - 6.444)  | 0.156   | 2.215 (0.751 - 6.536)  | 0.150   |
| White Race [Other race/ethnicity]                 | 1.972 (0.446 - 8.723)  | 0.371   | 1.867 (0.427 - 8.159)  | 0.407   | 1.984 (0.445 - 8.835)  | 0.369   |
| Within-subject mean SBP (mm Hg)                   | 1.003 (0.962 - 1.045)  | 0.901   | 1.002 (0.961 - 1.044)  | 0.929   | 0.994 (0.947 - 1.044)  | 0.818   |
| Hypertension                                      |                        |         | 0.637 (0.199 - 2.038)  | 0.447   | 0.605 (0.188 - 1.950)  | 0.400   |
| Depression                                        |                        |         | 0.632 (0.179 - 2.230)  | 0.476   | 0.617 (0.174 - 2.188)  | 0.454   |
| Body mass index (kg/m <sup>2</sup> )              |                        |         |                        |         | 1.032 (0.932 - 1.143)  | 0.542   |
| Pseudo R <sup>2</sup>                             | 0.265                  |         | 0.273                  |         | 0.276                  |         |
| Hosmer-Lemeshow Test (df), p-value                | 2.691 (8); p = 0.9522  |         | 7.885 (8); p = 0.4448  |         | 6.6506 (8); p = 0.5748 |         |
| Area under the ROC Curve                          | 0.823                  |         | 0.826                  |         | 0.831                  |         |
| AIC                                               | 107.184                |         | 110.186                |         | 111.814                |         |
| BIC                                               | 124.836                |         | 132.883                |         | 137.032                |         |

\* Reference categories are in angle brackets. P-values were NOT corrected for multiple comparison. PDDS scores ≥ 3 indicate moderate to severe disability. PDDS = patient determined disease steps; SBP = systolic blood pressure. AIC = Akaike information criterion; BIC = Bayesian information criterion.

Table e-2. Ordinal logistic regression for MS patients in a higher disability group with the number of SBP measures as a covariate (N = 92)\*

| Variables                                        | Estimate (95% CI)      | P-Value |
|--------------------------------------------------|------------------------|---------|
| SBP variability tertiles [1 (Lowest Variability) |                        |         |
| 2                                                | 3.090 (0.959 - 9.956)  | 0.059   |
| 3 (Highest Variability)                          | 5.204 (1.576 - 17.182) | 0.007   |
| Age                                              | 1.101 (1.053 - 1.151)  | 0.000   |
| Female [Male]                                    | 2.598 (1.023 - 6.595)  | 0.045   |
| White Race [Other race/ethnicity]                | 1.333 (0.411 - 4.319)  | 0.632   |
| Within-subject mean SBP (mm Hg)                  | 1.013 (0.977 - 1.050)  | 0.489   |
| Number of within-subject SBP measures            | 1.084 (0.990 - 1.188)  | 0.083   |

\* Reference categories are in angle brackets. SBP = systolic blood pressure.

Table e-3. Ordinary least squares models to predict SBP variability before the study (N = 92)\*

| Variables                             | Model 1                 |         | Model 2                 |         | Model 3                 |         |
|---------------------------------------|-------------------------|---------|-------------------------|---------|-------------------------|---------|
|                                       | Estimate (95% CI)       | P-Value | Estimate (95% CI)       | P-Value | Estimate (95% CI)       | P-Value |
| Intercept                             | 0.098 (0.069 - 0.128)   | 0.000   | 0.042 (-0.027 - 0.110)  | 0.232   | 0.046 (-0.023 - 0.115)  | 0.189   |
| PDDS severity [1 (No or Mild)]        |                         |         |                         |         |                         |         |
| 2 (Moderate)                          | 0.010 (-0.009 - 0.029)  | 0.286   | 0.011 (-0.008 - 0.030)  | 0.256   | 0.011 (0.009 - 0.030)   | 0.274   |
| 3 (Severe)                            | 0.019 (-0.001 - 0.039)  | 0.059   | 0.019 (-0.001 - 0.040)  | 0.063   | 0.019 (-0.002 - 0.040)  | 0.070   |
| Age (per 100 y)                       | 0.000 (-0.001 - 0.001)  | 0.567   | 0.000 (-0.001 - 0.000)  | 0.340   | 0.000 (-0.001 - 0.000)  | 0.244   |
| Female [Male]                         | -0.004 (-0.019 - 0.010) | 0.544   | -0.006 (-0.020 - 0.009) | 0.424   | -0.005 (-0.020 - 0.009) | 0.468   |
| White Race [Other race/ethnicity]     | -0.018 (-0.038 - 0.002) | 0.075   | -0.017 (-0.037 - 0.003) | 0.097   | -0.015 (-0.036 - 0.005) | 0.137   |
| Within-subject mean SBP (mm Hg)       |                         |         | 0.001 (0.000 - 0.001)   | 0.056   | 0.001 (-0.000 - 0.001)  | 0.073   |
| Number of within-subject SBP measures |                         |         | 0.000 (-0.001 - 0.001)  | 0.958   | 0.000 (-0.001 - 0.001)  | 0.918   |
| BMI (kg/m <sup>2</sup> )              |                         |         |                         |         | -0.000 (-0.001 - 0.001) | 0.896   |
| Depression                            |                         |         |                         |         | 0.001 (-0.017 - 0.018)  | 0.954   |
| Hypertension                          |                         |         |                         |         | -0.013 (-0.029 - 0.001) | 0.078   |

\* Reference categories are in angle brackets. P-values are not corrected for multiple comparison. PDDS = patient determined disease steps; SBP = systolic blood pressure; BMI = body mass index.



Table e-4. Ordinary least squares models to predict SBP variability post study (N = 89)\*

| Variables                       | Model 1                 |         | Model 2                 |         | Model 3                 |         |
|---------------------------------|-------------------------|---------|-------------------------|---------|-------------------------|---------|
|                                 | Estimate (95% CI)       | P-Value | Estimate (95% CI)       | P-Value | Estimate (95% CI)       | P-Value |
| Intercept                       | 0.072 (0.041 - 0.103)   | < 0.001 | 0.008 (-0.069 - 0.084)  | 0.840   | 0.004 (-0.073 - 0.082)  | 0.909   |
| PDDS scores [1 (No or Mild)]    |                         |         |                         |         |                         |         |
| 2 (Moderate)                    | 0.031 (0.011 - 0.051)   | 0.003   | 0.030 (0.010 - 0.050)   | 0.004   | 0.029 (0.008 - 0.050)   | 0.007   |
| 3 (Severe)                      | 0.021 (0.000 - 0.042)   | 0.052   | 0.018 (-0.004 - 0.040)  | 0.101   | 0.018 (-0.004 - 0.040)  | 0.115   |
| Age (per 100 y)                 | 0.001 (-0.076 - 0.077)  | 0.990   | -0.005 (-0.082 - 0.072) | 0.892   | 0.000 (-0.001 - 0.001)  | 0.898   |
| Female                          | -0.007 (-0.023 - 0.008) | 0.357   | -0.009 (-0.024 - 0.007) | 0.265   | -0.008 (-0.024 - 0.007) | 0.285   |
| White Race                      | -0.005 (-0.026 - 0.016) | 0.655   | -0.002 (-0.023 - 0.019) | 0.862   | -0.001 (-0.023 - 0.020) | 0.891   |
| Within-subject mean SBP (mm Hg) |                         |         | 0.000 (0.000 - 0.001)   | 0.103   | 0.000 (-0.000 - 0.001)  | 0.247   |
| Within-subject BP measures      |                         |         | 0.001 (0.000 - 0.002)   | 0.228   | 0.001 (-0.001 - 0.002)  | 0.396   |
| BMI (kg/m <sup>2</sup> )        |                         |         |                         |         | 0.000 (-0.001 - 0.002)  | 0.516   |
| Depression                      |                         |         |                         |         | 0.010 (-0.009 - 0.029)  | 0.280   |
| Hypertension                    |                         |         |                         |         | 0.001 (-0.016 - 0.018)  | 0.876   |

\* Reference categories are in angle brackets. P-values are not corrected for multiple comparison. PDDS = patient determined disease steps; SBP = systolic blood pressure; BMI = body mass index.
