# Supplementary material for: Retrospective cohort study of the relationship between systolic blood pressure variability and multiple sclerosis disability
Source: PubMed Central journal article supplement — BMJ Open. 2020 Feb 17;10(2):e034355. doi: 10.1136/bmjopen-2019-034355 (PMC7045000; doi:10.1136/bmjopen-2019-034355), 2020-02-17
Supplement: bmjopen-2019-034355supp001.pdf [file bmjopen-2019-034355supp001.pdf]

Table e-1. Logistic regression results for patients having PDDS scores  $\geq 3$  (N = 92)\*

| Variable                                          | Model 1                |         | Model 2                |         | Model 3                |         |
|---------------------------------------------------|------------------------|---------|------------------------|---------|------------------------|---------|
|                                                   | OR (95% CI)            | P-Value | OR (95% CI)            | P-Value | OR (95% CI)            | P-Value |
| SBP variability tertiles [1 (Lowest Variability)] |                        |         |                        |         |                        |         |
| 2                                                 | 7.098 (1.745 - 28.862) | 0.006   | 7.767 (1.822 - 33.105) | 0.006   | 7.662 (1.783 - 32.928) | 0.006   |
| 3 (Highest Variability)                           | 4.564 (1.210 - 17.213) | 0.025   | 4.338 (1.124 - 16.749) | 0.033   | 4.273 (1.106 - 16.514) | 0.035   |
| Age                                               | 1.106 (1.047 - 1.168)  | < 0.001 | 1.107 (1.047 - 1.170)  | < 0.001 | 1.109 (1.048 - 1.174)  | < 0.001 |
| Female [ Male]                                    | 2.079 (0.718 - 6.020)  | 0.177   | 2.186 (0.741 - 6.444)  | 0.156   | 2.215 (0.751 - 6.536)  | 0.150   |
| White Race [Other race/ethnicity]                 | 1.972 (0.446 - 8.723)  | 0.371   | 1.867 (0.427 - 8.159)  | 0.407   | 1.984 (0.445 - 8.835)  | 0.369   |
| Within-subject mean SBP (mm Hg)                   | 1.003 (0.962 - 1.045)  | 0.901   | 1.002 (0.961 - 1.044)  | 0.929   | 0.994 (0.947 - 1.044)  | 0.818   |
| Hypertension                                      |                        |         | 0.637 (0.199 - 2.038)  | 0.447   | 0.605 (0.188 - 1.950)  | 0.400   |
| Depression                                        |                        |         | 0.632 (0.179 - 2.230)  | 0.476   | 0.617 (0.174 - 2.188)  | 0.454   |
| Body mass index (kg/m <sup>2</sup> )              |                        |         |                        |         | 1.032 (0.932 - 1.143)  | 0.542   |
| Pseudo R <sup>2</sup>                             | 0.265                  |         | 0.273                  |         | 0.276                  |         |
| Hosmer-Lemeshow Test (df), p-value                | 2.691 (8); p = 0.9522  |         | 7.885 (8); p = 0.4448  |         | 6.6506 (8); p = 0.5748 |         |
| Area under the ROC Curve                          | 0.823                  |         | 0.826                  |         | 0.831                  |         |
| AIC                                               | 107.184                |         | 110.186                |         | 111.814                |         |
| BIC                                               | 124.836                |         | 132.883                |         | 137.032                |         |

\* Reference categories are in angle brackets. P-values were NOT corrected for multiple comparison. PDDS scores  $\geq 3$  indicate moderate to severe disability. PDDS = patient determined disease steps; SBP = systolic blood pressure. AIC = Akaike information criterion; BIC = Bayesian information criterion.
