# Supplementary material for: Retrospective cohort study of the relationship between systolic blood pressure variability and multiple sclerosis disability
Source: PubMed Central journal article supplement — BMJ Open. 2020 Feb 17;10(2):e034355. doi: 10.1136/bmjopen-2019-034355 (PMC7045000; doi:10.1136/bmjopen-2019-034355), 2020-02-17
Supplement: bmjopen-2019-034355supp002.pdf [file bmjopen-2019-034355supp002.pdf]

Table e-2. Ordinal logistic regression for MS patients in a higher disability group with the number of SBP measures as a covariate (N = 92)\*

| <b>Variables</b>                                 | <b>Estimate (95% CI)</b> | <b>P-Value</b> |
|--------------------------------------------------|--------------------------|----------------|
| SBP variability tertiles [1 (Lowest Variability) |                          |                |
| 2                                                | 3.090 (0.959 - 9.956)    | 0.059          |
| 3 (Highest Variability)                          | 5.204 (1.576 - 17.182)   | 0.007          |
| Age                                              | 1.101 (1.053 - 1.151)    | 0.000          |
| Female [Male]                                    | 2.598 (1.023 - 6.595)    | 0.045          |
| White Race [Other race/ethnicity]                | 1.333 (0.411 - 4.319)    | 0.632          |
| Within-subject mean SBP (mm Hg)                  | 1.013 (0.977 - 1.050)    | 0.489          |
| Number of within-subject SBP measures            | 1.084 (0.990 - 1.188)    | 0.083          |

\* Reference categories are in angle brackets. SBP = systolic blood pressure.
