# Supplementary material for: Retrospective cohort study of the relationship between systolic blood pressure variability and multiple sclerosis disability
Source: PubMed Central journal article supplement — BMJ Open. 2020 Feb 17;10(2):e034355. doi: 10.1136/bmjopen-2019-034355 (PMC7045000; doi:10.1136/bmjopen-2019-034355), 2020-02-17
Supplement: bmjopen-2019-034355supp003.pdf [file bmjopen-2019-034355supp003.pdf]

Table e-3. Ordinary least squares models to predict SBP variability before the study (N = 92)\*

| Variables                             | Model 1                 |         | Model 2                 |         | Model 3                 |         |
|---------------------------------------|-------------------------|---------|-------------------------|---------|-------------------------|---------|
|                                       | Estimate (95% CI)       | P-Value | Estimate (95% CI)       | P-Value | Estimate (95% CI)       | P-Value |
| Intercept                             | 0.098 (-0.069 - 0.128)  | 0.000   | 0.042 (-0.027 - 0.110)  | 0.232   | 0.046 (-0.023 - 0.115)  | 0.189   |
| PDDS severity [1 (No or Mild)]        |                         |         |                         |         |                         |         |
| 2 (Moderate)                          | 0.010 (-0.009 - 0.029)  | 0.286   | 0.011 (-0.008 - 0.030)  | 0.256   | 0.011 (-0.009 - 0.030)  | 0.274   |
| 3 (Severe)                            | 0.019 (-0.001 - 0.039)  | 0.059   | 0.019 (-0.001 - 0.040)  | 0.063   | 0.019 (-0.002 - 0.040)  | 0.070   |
| Age (per 100 y)                       | 0.000 (-0.001 - 0.001)  | 0.567   | 0.000 (-0.001 - 0.000)  | 0.340   | 0.000 (-0.001 - 0.000)  | 0.244   |
| Female [Male]                         | -0.004 (-0.019 - 0.010) | 0.544   | -0.006 (-0.020 - 0.009) | 0.424   | -0.005 (-0.020 - 0.009) | 0.468   |
| White Race [Other race/ethnicity]     | -0.018 (-0.038 - 0.002) | 0.075   | -0.017 (-0.037 - 0.003) | 0.097   | -0.015 (-0.036 - 0.005) | 0.137   |
| Within-subject mean SBP (mm Hg)       |                         |         | 0.001 (0.000 - 0.001)   | 0.056   | 0.001 (-0.000 - 0.001)  | 0.073   |
| Number of within-subject SBP measures |                         |         | 0.000 (-0.001 - 0.001)  | 0.958   | 0.000 (-0.001 - 0.001)  | 0.918   |
| BMI (kg/m <sup>2</sup> )              |                         |         |                         |         | -0.000 (-0.001 - 0.001) | 0.896   |
| Depression                            |                         |         |                         |         | 0.001 (-0.017 - 0.018)  | 0.954   |
| Hypertension                          |                         |         |                         |         | -0.013 (-0.029 - 0.001) | 0.078   |

\* Reference categories are in angle brackets. P-values are not corrected for multiple comparison. PDDS = patient determined disease steps; SBP = systolic blood pressure; BMI = body mass index.
