# Supplementary material for: Retrospective cohort study of the relationship between systolic blood pressure variability and multiple sclerosis disability
Source: PubMed Central journal article supplement — BMJ Open. 2020 Feb 17;10(2):e034355. doi: 10.1136/bmjopen-2019-034355 (PMC7045000; doi:10.1136/bmjopen-2019-034355), 2020-02-17
Supplement: bmjopen-2019-034355supp004.pdf [file bmjopen-2019-034355supp004.pdf]

Table e-4. Ordinary least squares models to predict SBP variability post study (N = 89)\*

| Variables                       | Model 1                 |         | Model 2                 |         | Model 3                 |         |
|---------------------------------|-------------------------|---------|-------------------------|---------|-------------------------|---------|
|                                 | Estimate (95% CI)       | P-Value | Estimate (95% CI)       | P-Value | Estimate (95% CI)       | P-Value |
| Intercept                       | 0.072 (0.041 - 0.103)   | < 0.001 | 0.008 (-0.069 - 0.084)  | 0.840   | 0.004 (-0.073 - 0.082)  | 0.909   |
| PDDS scores [1 (No or Mild)]    |                         |         |                         |         |                         |         |
| 2 (Moderate)                    | 0.031 (0.011 - 0.051)   | 0.003   | 0.030 (0.010 - 0.050)   | 0.004   | 0.029 (0.008 - 0.050)   | 0.007   |
| 3 (Severe)                      | 0.021 (0.000 - 0.042)   | 0.052   | 0.018 (-0.004 - 0.040)  | 0.101   | 0.018 (-0.004 - 0.040)  | 0.115   |
| Age (per 100 y)                 | 0.001 (-0.076 - 0.077)  | 0.990   | -0.005 (-0.082 - 0.072) | 0.892   | 0.000 (-0.001 - 0.001)  | 0.898   |
| Female                          | -0.007 (-0.023 - 0.008) | 0.357   | -0.009 (-0.024 - 0.007) | 0.265   | -0.008 (-0.024 - 0.007) | 0.285   |
| White Race                      | -0.005 (-0.026 - 0.016) | 0.655   | -0.002 (-0.023 - 0.019) | 0.862   | -0.001 (-0.023 - 0.020) | 0.891   |
| Within-subject mean SBP (mm Hg) |                         |         | 0.000 (0.000 - 0.001)   | 0.103   | 0.000 (-0.000 - 0.001)  | 0.247   |
| Within-subject BP measures      |                         |         | 0.001 (0.000 - 0.002)   | 0.228   | 0.001 (-0.001 - 0.002)  | 0.396   |
| BMI (kg/m <sup>2</sup> )        |                         |         |                         |         | 0.000 (-0.001 - 0.002)  | 0.516   |
| Depression                      |                         |         |                         |         | 0.010 (-0.009 - 0.029)  | 0.280   |
| Hypertension                    |                         |         |                         |         | 0.001 (-0.016 - 0.018)  | 0.876   |

\* Reference categories are in angle brackets. P-values are not corrected for multiple comparison. PDDS = patient determined disease steps; SBP = systolic blood pressure; BMI = body mass index.
